1 Genetic mechanisms and biological processes underlying host  
2 response to ophidiomycosis (Snake Fungal Disease) inferred  
3 from tissue-specific transcriptome analyses.

4 Samarth Mathur<sup>1,2\*</sup>, Ellen Haynes<sup>3,4</sup>, Matthew C. Allender<sup>3,5</sup>, H. Lisle Gibbs<sup>1,2\*</sup>

5

6 <sup>1</sup>Department of Evolution, Ecology, and Organismal Biology, The Ohio State University,  
7 Columbus, OH, USA

8 <sup>2</sup>Ohio Biodiversity Conservation Partnership, The Ohio State University, Columbus, OH, USA

9 <sup>3</sup>Wildlife Epidemiology Laboratory, College of Veterinary Medicine, University of Illinois at  
10 Urbana-Champaign, Urbana, IL, USA

11 <sup>4</sup>Southeastern Cooperative Wildlife Disease Study, University of Georgia, Athens, GA, USA

12 <sup>5</sup>Brookfield Zoo, Chicago Zoological Society, Brookfield, IL, USA

13

14 \* Corresponding authors:

15 Email: [mathur.112@osu.edu](mailto:mathur.112@osu.edu) (SM)

16 Email: [gibbs.128@osu.edu](mailto:gibbs.128@osu.edu) (HLG)

17

18 **Short Title:** Host response to snake fungal disease

19

20

21

## 22 **Abstract**

23           There is growing concern about infectious diseases in wildlife species caused by  
24 pathogenic fungi. Detailed knowledge exists about host pathology and the molecular  
25 mechanisms underlying host physiological response to some fungal diseases affecting  
26 amphibians and bats but is lacking for others with potentially significant impacts on large groups  
27 of animals. One such disease is ophidiomycosis (Snake Fungal Disease; SFD) which is caused  
28 by the fungus *Ophidiomyces ophidiicola* and impacts diverse species of snakes. Despite this  
29 potential, the biological mechanisms and molecular changes occurring during infection are  
30 unknown for any snake species. To gain this information, we performed a controlled  
31 experimental infection of captive Prairie rattlesnakes (*Crotalus viridis*) with *O. ophidiicola* at  
32 different temperatures. We then generated liver, kidney, and skin transcriptomes from control  
33 and infected snakes to assess tissue specific genetic responses to infection. Given previous SFD  
34 histopathological studies and the fact that snakes are ectotherms, we expected highest fungal  
35 activity on skin and a significant impact of temperature on host response. In contrast, we found  
36 that most of the differential gene expression was restricted to internal tissues and fungal-infected  
37 snakes showed transcriptome profiles indicative of long-term inflammation of specific tissues.  
38 Infected snakes at the lower temperature had the most pronounced overall host functional  
39 response whereas, infected snakes at the higher temperature had overall expression profiles  
40 similar to control snakes possibly indicating recovery from the disease. Overall, our results  
41 suggest SFD is a systemic disease with a chronic host response, unlike acute response shown by  
42 amphibians to *Batrachochytrium dendrobatidis* infections. Our analysis also generated a list of  
43 candidate protein coding genes that potentially mediate SFD response in snakes, providing tools

44 for future comparative and evolutionary studies into variable species susceptibility to  
45 ophidiomycosis.

46

## 47 **Author summary**

48 Ophidiomycosis (Snake Fungal Disease; SFD) is an infectious fungal disease in snakes  
49 that has been documented in more than 40 species over the past 20 years. Though many snake  
50 species seem vulnerable to SFD, little is known about how snake physiology changes in response  
51 to infection with the causative fungus, *Ophidiomyces ophidiicola*. Here we report results from  
52 the first experimental transcriptomic study of SFD in a snake host. Our goals were to identify  
53 genes with a putative role in host response, use this information to understand what biological  
54 changes occur in different tissues in snakes when infected with *O. ophidiicola*, and determine if  
55 temperature has an impact in these ectothermic animals. We conclude that SFD is a systemic  
56 disease with a chronic inflammation leading to deterioration of internal organs and that these  
57 physiological impacts are more pronounced at low rather than high temperatures. These results  
58 contrast with fungal infections in amphibians where hosts show an acute response mostly  
59 restricted to skin. Our list of candidate genes carry utility in potentially diagnosing genetic  
60 susceptibility to SFD in snake species of conservation concern.

61

## 62 **Introduction**

63 Infectious wildlife diseases are an increasing threat to global wildlife diversity and have  
64 led to significant species declines as well as impacts on human health and livestock (1, 2). One  
65 class of wildlife infectious diseases are caused by pathogenic fungi. Two well-studied examples

66 of fungal diseases in wildlife are chytridiomycosis in amphibians caused by the chytrid fungus  
67 *Batrachochytrium dendrobatidis* (*Bd*) (3), and white-nose syndrome in bats caused by fungus  
68 *Pseudogymnoascus destructans* (4). Infection with *Bd* disrupts the integrity of skin and is  
69 responsible for amphibian species declines worldwide (5, 6). Skin is a critical organ for  
70 amphibians and is involved in physiological activities such as respiration, ion balance, hydration,  
71 and defense against other pathogens; thus, infected hosts have high mortality (7, 8). White-nose  
72 syndrome is one of the most damaging infectious disease epidemics in bats (9) that caused  
73 extirpations of entire populations of many bat species (9, 10). The lesions caused by *P.*  
74 *destructans* are mostly found on bat ears and nose, but infections are most severe in the wing and  
75 tail tissues. *P. destructans* infection disrupts crucial regulatory functions like thermoregulation,  
76 gas exchange and immune function (11) which subsequently results in loss of fat store and  
77 starvation and eventual death of the bat host (12).

78 Numerous studies on both diseases (9, 13) have revealed detailed information about the  
79 effects of infection on different tissues (14), the effects of key environmental factors like  
80 temperature (15) and humidity (16), the role of co-infections with other pathogens (14), and even  
81 variable immune responses (17) and susceptibility among different species (18). This  
82 information is crucial to understand the disease systems, prevent outbreaks, and identify  
83 vulnerable populations. Fungal pathogens have been recognized in numerous additional taxa,  
84 including sea turtles (19), corals (20), lizards (21), honeybees (22), and various plants (23, 24),  
85 but estimates of disease prevalence and understanding of host responses to such pathogens are  
86 lacking in most species (25-27). The recent emergence and global spread of fungal pathogens  
87 have led to increased surveillance efforts for known pathogens and the need to understand how

88 specific diseases impact infected individuals to understand the pathological mechanisms that  
89 underlie disease infections (23, 25, 27, 28)

90 One example of a poorly understood but potentially impactful disease is ophidiomycosis  
91 (snake fungal disease; SFD). SFD is a recently identified fungal disease in snakes caused by the  
92 fungus *Ophidiomyces ophidiicola* and has been detected in many free-ranging and captive snake  
93 species (29-32). *O. ophidiicola* is a generalist fungus and is known to infect a wide range of  
94 snake species with different ecologies irrespective of taxonomy and habitat (33). First reported in  
95 the mid-2000s, but likely present as early as the 1940's (34-36), SFD has since been documented  
96 in more than 30 species of wild snakes in the United States and Europe (31) and instances of  
97 SFD have also been reported in Australia (37) and South East Asia (38, 39). Clinical signs of  
98 ophidiomycosis vary among individuals, from general signs such as lethargy, skin lesions,  
99 excessive shedding, to crusts, granulomas, corneal opacity, and ulcers on the head and body in  
100 more severe cases (29). Ophidiomycosis has the potential to cause widespread morbidity and  
101 mortality in snakes (31, 32, 35, 40, 41) but the mode of infection, specific mechanisms of  
102 pathology, and physiological responses by infected individuals are unclear despite the value of  
103 this information for understanding and mitigating the impact of this disease (29, 42).

104 Specifically, the two key elements of SFD pathology that are still unknown are (a) Is the  
105 snake host response is localized to the skin, as in the case of Bd infections in amphibians, or  
106 whether SFD is more systemic disease, like the white nose syndrome in bats? and (b) What is the  
107 influence of temperature on disease severity and host response of infected individuals?  
108 Experimental transcriptomics offers an approach to address these questions by allowing us to  
109 identify differentially expressed genes in multiple tissues, and then using functional enrichment

110 and pathway networks approaches to identify what biological processes are occurring differently  
111 among tissue of infected and uninfected hosts.

112 Previous histopathological studies (43) identified *O. ophidiicola* infection to be localized  
113 to skin (30), so we expect the highest fungal activity on skin. Therefore, if the snake response to  
114 fungal infection is similar to amphibians, we predict most differential expression on skin tissue  
115 (14). Secondly, since snakes are ectotherms i.e., their thermoregulation is dependent on external  
116 temperatures, we predict that temperature would have a crucial impact on overall host response.  
117 Field evidence suggest that many infected snakes preferably move towards higher temperatures  
118 (44, 45) and can potentially recover from SFD (46). Additionally, pathogenic activity of many  
119 fungal species is temperature dependent and host defense against the infection is more effective  
120 at higher temperature in many vertebrate species (47, 48). Studies of SFD in free ranging snakes  
121 have also indicated that SFD severity declines with higher temperatures and higher fungal  
122 prevalence in cooler seasons (45).

123 Here, we studied the snake host response to SFD by performing controlled *O. ophidiicola*  
124 exposure experiments in Prairie rattlesnakes (*Crotalus viridis*) at 20°C and 26°C. Prairie  
125 rattlesnakes are a common and widely distributed snake species and are closely related to many  
126 species that are susceptible to SFD (33) which makes them a good model for controlled exposure  
127 experiments. We describe the genetic and physiological changes in multiple tissues due to *O.*  
128 *ophidiicola* exposure and also the effect of different temperatures by comparing the changes in  
129 transcriptome profiles of different organs under different conditions. Finally, we identified a list  
130 of candidate genes that are putatively involved in host response which could be used in  
131 diagnostic screening of more vulnerable populations and species of snakes, as done in *Bd* and  
132 other wildlife diseases (49).

133

## 134 **Results**

### 135 **Experimental infections, transcriptome sequencing, and data pre-processing**

136 All snakes were free of clinical signs over 24 months prior and at the start of the study.  
137 First clinical signs in *O. ophidiicola* infected snakes were observed around 40-45 days post  
138 infection (dpi). All infected snakes at 20°C were euthanized before the end of the study due to the  
139 severity of clinical signs, while only one infected snake was prematurely euthanized at 26°C. The  
140 remaining two infected snakes at 26°C survived with mild-to-moderate clinical signs until the end  
141 of the study (90 dpi). All uninfected control animals survived throughout the study period (Table  
142 S1).

143 RNA was isolated and sequenced from liver, kidney, and skin tissues collected from each  
144 infected and uninfected snakes at the end of the study. Following sample processing and evaluation  
145 of library sequence quality, we retained transcriptome sequence data from 10 liver, 11 kidney, and  
146 10 skin tissues from snakes subjected to different temperature (26°C vs. 20°C) and infection status  
147 (infected vs. control) (Fig. 1A; Table S1). Our sequencing of the RNAseq libraries resulted in the  
148 generation of a mean of 31.7 million read pairs (SD = 16.8 million) per sample (Table S2). After  
149 adapter trimming and removal of low-quality reads, the overall alignment rate for the remaining  
150 filtered reads to the *C. viridis* reference genome for each sample was  $59.3\% \pm 14.8\%$  (mean  $\pm$  SD;  
151 Table S2) with  $8.3\% \pm 2.3\%$  of all aligned read pairs successfully assigned to the annotated regions  
152 of the *C. viridis* assembly. We measured alignment rate as the percentage of transcripts that  
153 mapped uniquely and concordantly to the reference genome. The alignment percentage to the *C.*  
154 *viridis* reference genome was lowest in skin tissues (liver =  $61.6 \pm 6.2\%$ ; kidney =  $65.0 \pm 3.7\%$ ;  
155 skin =  $50.8 \pm 23.3\%$ ) and one sample had only 1% of total transcripts aligning (Table S2).

## 156 **Overall host response to SFD exposure is temperature dependent**

157 We first visualized the sample groupings based on overall gene expression data using  
158 multivariate analyses. PCA plots generated from log normalized read counts of all assembled  
159 transcripts indicate that infected snakes at the lower temperature had an expression profile that  
160 differed from all other tissue-treatment combinations in all three tissue types (Fig. 1B-D). Both  
161 hierarchical clustering and discriminant analysis on principle components (DAPC) clustered  
162 infected snakes at 20°C as one group with all other samples forming separate groups (Fig. 1B-D,  
163 Fig. S1). More interestingly, infected snakes maintained at 26°C show a similar overall gene  
164 expression profile as all the control snakes. This means that by the end of the study, host  
165 response to *O. ophidiicola* infection is different from controls at the lower but not at the higher  
166 temperature treatment. Even though infected samples clustered based on temperature, no such  
167 pattern existed for control samples as different control samples clustered together, regardless of  
168 temperature conditions (Fig. 1B-C; Fig. S1). Overall, these results indicate that snakes infected  
169 with *O. ophidiicola* at low temperature respond most differently with a unique expression  
170 signature, and that high similarity in gene expression between infected snakes at the higher  
171 temperature and control snakes by the end of the study is indicative of possible recovery.



172

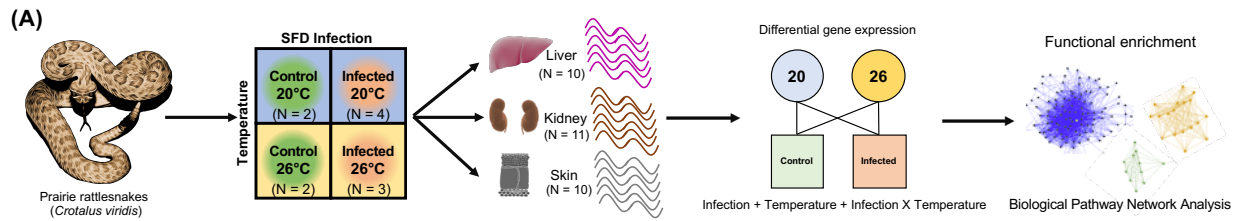

173

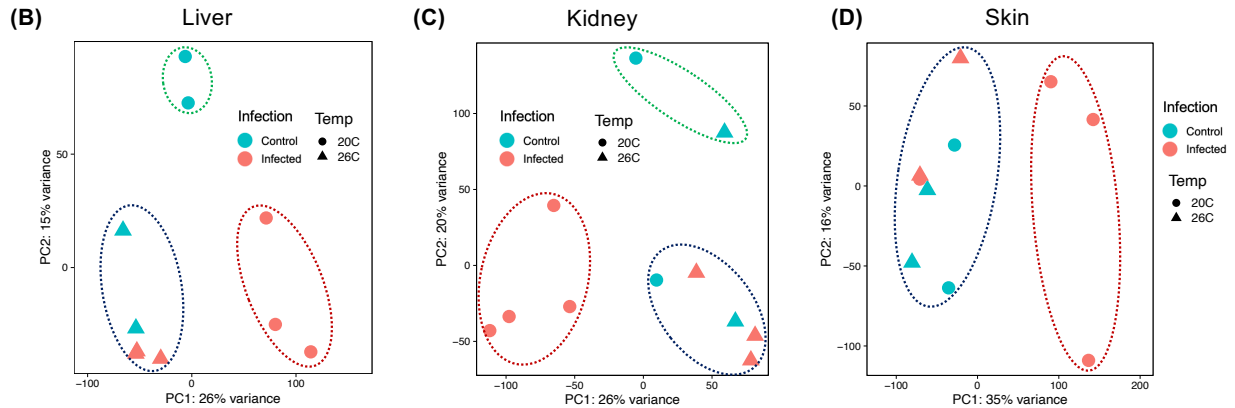

174 **Fig 1. Methodological overview of the study and overall individual gene expression profile.**  
 175 (A) Schematic showing the experimental design for the controlled ophidiomycosis infection trial  
 176 to study the host response. Prairie rattlesnakes (*Crotalus viridis*) were exposed to the causative  
 177 fungus *Ophidiomyces ophiodiicola* ("infected") or sham inoculations ("control") at either higher  
 178 (26°C) or lower (20°C) temperatures. N = number of samples within each group. After the end of  
 179 the study (90 dpi), RNA was extracted and sequenced from liver (N=10), kidney (N=11), and  
 180 skin (N=10) tissues of each individual. Differential gene expression (DGE) analysis was  
 181 performed using infection status, temperature, and the interaction between infection and  
 182 temperature (Infection X Temperature) as fixed effects. Each tissue (liver, kidney, and skin)  
 183 was analyzed independently. Functional enrichment and pathway networks were then inferred from  
 184 biological functions of differentially expressed genes (DEGs). (B-D) Tissue specific expression  
 185 profile and individual clustering based on normalized read count data of all expressed genes in  
 186 (B) Liver, (C) Kidney, and (D) Skin. *O. ophiodiicola* infected snakes at the lower temperature (red  
 187 circles) cluster independently and are separated on PC1 axis (x-axis) in all three cases. Infected  
 188 snakes at the higher temperature (red triangles) have similar profile as control snakes at the  
 189 higher (blue triangles) or the lower (blue circles) temperature. The dotted circles represent the  
 190 number of clusters identified using a discriminant analysis.

191

## 192 Fungal gene expression identified only in skin tissues

193 To identify if fungal transcripts were present in our RNASeq data, we mapped the  
194 aligned filtered reads to the *O. ophidiicola* reference genome (see Methods). We expect that  
195 tissues with more actively growing fungus would have greater expression of fungal transcripts  
196 and thus, would have a higher alignment rate to the *O. ophidiicola* reference genome. We  
197 observed that most of the fungal transcripts in our samples were identified in skin tissues at the  
198 lower temperature ( $29.8\% \pm 37.4\%$ ) whereas all other samples (including skin tissues at the  
199 higher temperature treatment) had  $< 0.5\%$  fungal transcripts (Fig. S2). We next identified  
200 expressed fungal genes based on highest transcript counts (i.e. highest depth of coverage). In  
201 each skin tissue, we observed peaks of high expression at the same region of the fungal genome  
202 (see e.g. in Fig. S3). Since the *O. ophidiicola* reference genome is not yet annotated, we  
203 extracted the reference sequence corresponding to the highest transcript peaks and used BLAST  
204 (<https://blast.ncbi.nlm.nih.gov/>) to identify homologous genes in other fungal genomes. We  
205 identified expression of genes that encode myosin class V proteins (identity 80.1%, e-value = 0),  
206 chaperone protein DnaK (identity 86.6%, e-value = 0), and beta-glucosidase 4 (identity 77.1%, e-  
207 value =  $2e-15$ ). Myosin proteins are highly conserved in fungi (50) and all chytrid species  
208 contain at least one myosin class V protein (51) that have a function in intracellular transport.  
209 They are shown to localize in the actively growing hyphae (52). Similarly, beta-glucosidase  
210 enzymes breakdown complex macromolecules like cellulose or keratin (53) so, they might be  
211 important for damage to host skin tissues, and DnaK is part of the Heat Shock Protein (HSP)  
212 protein complex shown to be active during pathogenesis (54). Taken together, these results  
213 indicate that only skin tissues at the lower temperature have fungal expression and the fungal  
214 genes that have highest expression are likely involved in fungal growth and infection.

215

216 **SFD exposure leads to greater differential gene expression in internal organs**  
217 **compared to skin**

218 We conducted differential gene expression (DGE) analyses from the counts of all  
219 assembled transcripts for each tissue separately (Fig. 2A-C). Our analysis design included  
220 temperature (“Temperature”; low = 20°C vs. high = 26°C), infection status (“Infected”; *O.*  
221 *ophidiicola* infection vs. control), and an interaction effect between temperature and infection  
222 (“Infected X Temperature”) as fixed effects (Fig. 1A). We identified a total of 776 DEGs in  
223 liver (Infected = 503; Temperature = 182; Infected X Temperature = 91; Fig. 2A), 705 DEGs in  
224 kidney (Infected = 507; Temperature = 131; Infected X Temperature = 67; Fig. 2B), and only 17  
225 DEGs in skin (Infected = 15; Temperature = 2; Fig. 2C). We did not identify any DEGs due to  
226 the interaction between infection and temperature in skin. In terms of changes in expression, the  
227 majority of genes in liver (457/776; 58.9%) and skin (12/17; 70.6%) were upregulated, whereas  
228 majority of the genes in kidney (452/705; 64.1%) were down regulated.

229 To identify DEGs due to the impact of a single fixed effect, we isolated DEGs that did  
230 not overlap with the two other fixed effects. These results are shown in Fig. 2D-F and Fig. S4. In  
231 all three tissue types, *O. ophidiicola* infection alone caused more changes in gene expression  
232 than either temperature or the interaction between temperature and infection (liver = 423; kidney  
233 = 429; skin = 15; Fig. 2D-F). Most of the DEGs due to infection only were specific to each tissue  
234 (Fig. S4) which indicates that *O. ophidiicola* infection impacts different biological processes in  
235 different internal organs, specifically in liver and kidney.

236

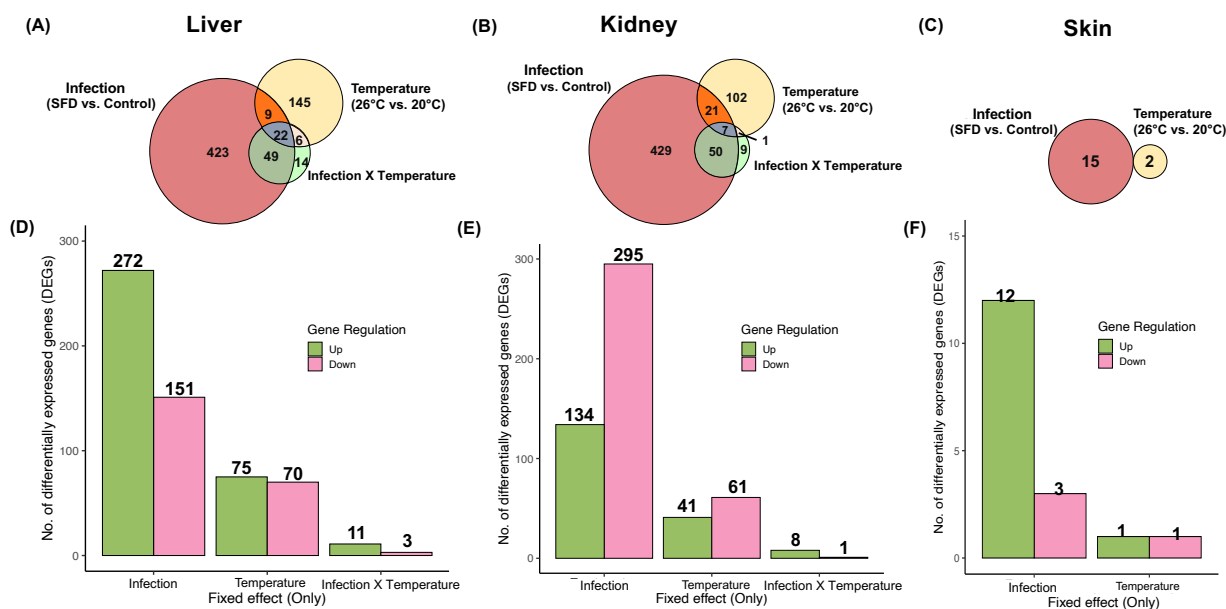

237

238 **Fig 2. Differential gene expression (DGE) due to fixed effects.** Euler plots showing overlap in  
 239 differential gene expression due to fixed effects of *O. ophidiicola* infection (Infected vs.  
 240 Control), temperature (26°C vs 20°C), and the interaction between infection and temperature  
 241 (Infection X Temperature) for (A) liver, (B) kidney, and (C) skin tissues. The number within  
 242 each plot represent the number of differentially expressed genes. There was no interaction  
 243 between infection and temperature in the analysis of skin tissue. Panels D-F show the number of  
 244 upregulated (green) and downregulated (pink) genes unique to each fixed effect. There were  
 245 more upregulated than downregulated genes for each effect in (D) liver, whereas more genes  
 246 were downregulated due to infection and temperature in (E) kidney. More genes were  
 247 upregulated in (F) skin due to infection.  
 248

## 249 **SFD exposure induces a pro-inflammatory response and disrupts metabolism** 250 **in liver**

251 Most of the upregulated genes in liver were enriched in Biological Processes Gene  
 252 Ontology (GO:BP) terms, “cellular response to organic stimulus” (35%; 475/1369),  
 253 “developmental/metabolic processes” (49%; 666/1369) , “immune response” (6%; 76/1369) and  
 254 “cell death/apoptosis” (9%; 116/1369) suggesting positive cell differentiation as an inflammatory  
 255 immune response to organic antigens (Fig. 3A). Upregulated genes like Colony-stimulating

256 factor 1 receptor (*CTF1R*) mediate macrophage signaling, and *CTF1R* expression is crucial for  
257 the differentiation and survival of the mononuclear phagocyte system (55). In contrast, *MKNK2*  
258 is associated with interleukin-1 signaling pathway and its overexpression is associated with cell  
259 proliferation and reduction of apoptosis (56). We also identified 11 upregulated genes that are  
260 involved in the MAPK signaling pathway that initiates from a diverse range of stimuli and elicit  
261 an appropriate physiological response including cell proliferation, differentiation and migration,  
262 development, inflammatory responses and regulation of apoptosis (Fig. S5). Our results indicate  
263 that *O. ophidiicola* infection triggers an immune response in the liver and facilitates an  
264 inflammatory response by positively regulating cell proliferation and inhibiting programmed cell  
265 death.

266 In terms of DEGs that were downregulated in liver tissue, most of the genes represent  
267 amino acid metabolism (91%: 182/200), steroid homeostasis (7%; 14/200), and gluconeogenesis  
268 (2%: 4/200; Fig. 3B). Steroid hormones mediate stress induced metabolic regulation and immune  
269 modulation (57). Negative regulation of steroid homeostasis in liver is associated with a pro-  
270 inflammatory response (57) and reduction of protein metabolism for glucose and glycogen  
271 synthesis (58). This means that the inflammatory response to *O. ophidiicola* results in liver being  
272 unable to metabolize proteins necessary for proper functioning. We also created networks or  
273 clusters of co-expressed genes (“modules”) using weighted gene co-expression network analysis  
274 to test if any modules were significantly associated with infection. After adjusting P values to  
275 account for multiple testing, we identified five modules significantly associated with infection  
276 status in liver tissue (Table S3) including genes enriched in Peroxisome KEGG pathway (Fig.  
277 S6). Peroxisomes break down complex fatty acids and subsequently regulate multiple metabolic  
278 pathways (59). Most of the genes within the peroxisome pathway were downregulated in liver

279 tissues from infected snakes (Fig. S7). Peroxisome activation genes like *PPAR $\alpha$*  downregulates  
 280 various immunity-related pathways (59), so the lower production of *PPAR $\alpha$*  in liver tissue from  
 281 infected snakes is a signature of higher immune response.

282 Overall, our DGE analysis indicates that *O. ophidiicola* infection is associated with stress  
 283 induced liver inflammation, as well as lower steroid production and protein metabolism which  
 284 leads to lipid and protein accumulation within hepatic cells. These physiological changes are  
 285 hallmarks of chronic liver diseases like liver injury and fatty liver disease and are characterized  
 286 by fibrosis and cirrhosis of the liver (60).

287

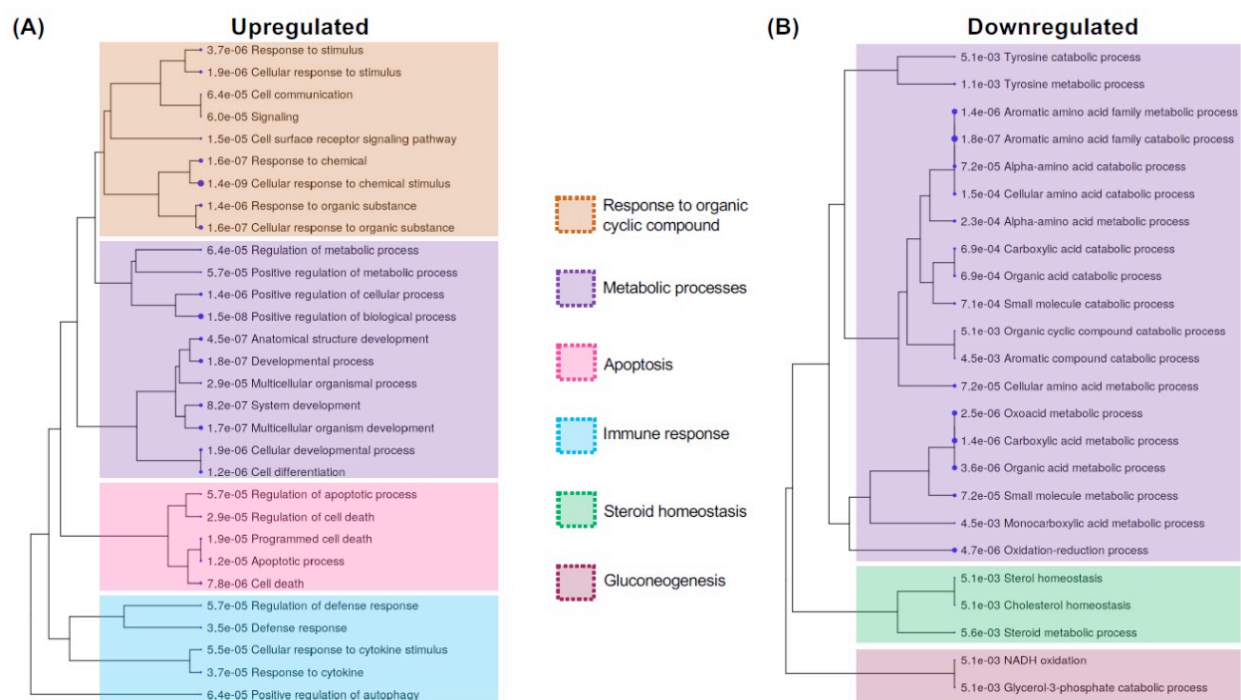

288

289 **Fig 3. Biological processes that were differentially regulated in liver due to SFD exposure.**  
 290 Hierarchical clustering tree summarizing the correlation among significant Biological process  
 291 gene ontology terms (GO:BP) for genes that were (A) upregulated, or (B) downregulated in liver.  
 292 Numbers indicate p-values after FDR correction for multiple testing. Each process terms were  
 293 categorized as subclass of specific parent terms as represented by colored boxes.

294

## 295 **SFD exposure lowers protein metabolism and disrupts ion balance in kidney**

296 In kidney tissues from infected snakes, most of the overexpressed genes reduce protein  
297 metabolism by inhibiting proteolysis, and protein degradation, and catalytic activity in kidney  
298 cells (Fig. 4A). Proteolysis eliminates irregular proteins, controls cellular regulatory processes,  
299 and provides amino acids for cellular remodeling (61). This means that in kidney tissues from  
300 infected snakes, just like in liver tissues from these animals, pathways that perform normal  
301 protein breakdown were being under-expressed which could indicate disruption to normal renal  
302 physiology (62).

303 Among the downregulated genes in kidneys of infected snakes, most belonged to  
304 biological pathways that regulate steroid metabolism, localization and transmembrane transport,  
305 and integrin synthesis (Fig. 4B). Just as in liver, steroid synthesis was also downregulated in  
306 kidney, which affects many cell-signaling pathways including electrolyte balance maintained by  
307 the kidney (63). Calcium ion signaling and transport regulates the levels of calcium in the urine  
308 and transport of bile acid and bile salts in kidney. Bile salts are important for degradation of fats,  
309 which helps in digestion and absorption of important vitamins, and elimination of toxins.  
310 Reduced integrin activity in kidney has been linked to diseases like congenital nephrotic  
311 syndromes (CNS) and severe edema (64). Seven gene network modules were significantly  
312 associated with infection status (Table S3) and were enriched in Ribosome and N-Glycan  
313 biosynthesis KEGG pathways (Fig. S8). Lower expression of ribosome biosynthesis genes (Fig.  
314 S7) also lowers protein synthesis and causes muscle atrophy, impaired growth of new muscle  
315 fibers and loss of kidney function (62).

316 Taken together, our DGE and functional enrichment analysis in kidney indicate that *O.*  
317 *ophidiicola* infections are associated with reduced kidney function, nephrotoxicity, loss of

318 protein metabolism, and muscular weakness. As bile is synthesized in the liver, it is likely that  
 319 infection-induced liver inflammation disturbs renal functioning as well via bile salt transport  
 320 pathways (65). These physiological changes are signatures of chronic kidney infections like  
 321 acute kidney injury and possibly indicates that chronic *O. ophidiicola* infection induces a cascade  
 322 of mechanisms that lead to multiple organ failure and eventual mortality in the host (66).

323

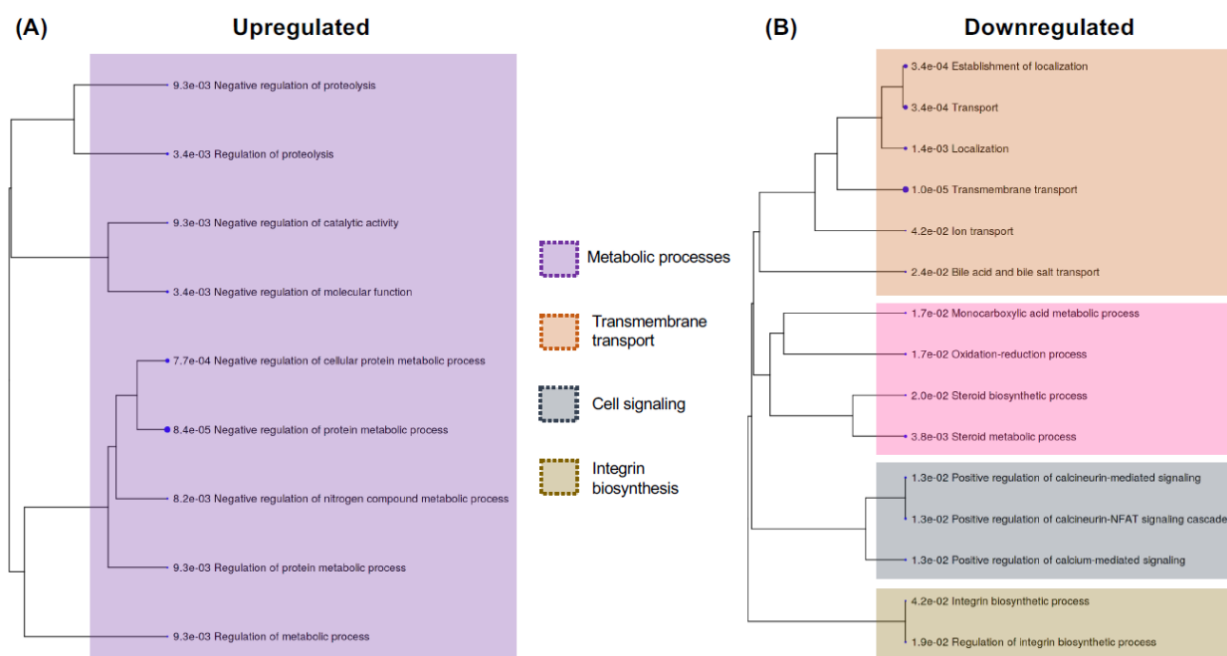

324

325 **Fig 4. Biological processes that were differentially regulated in kidney due to SFD**  
 326 **exposure.** Hierarchical clustering tree summarizing the correlation among significant Biological  
 327 process gene ontology terms (GO:BP) for genes that were (A) upregulated, or (B) downregulated  
 328 in kidney. Numbers indicate p-values after FDR correction for multiple testing. Each process  
 329 terms were categorized as subclass of specific parent terms as represented by colored boxes  
 330

### 331 **SFD exposure triggers immune response and DNA damage repair pathways** 332 **in skin**

333 In contrast to our findings in liver and kidney, we found little evidence for differential  
 334 gene expression in skin tissues between infected and control individuals (Fig.2). The overall



335 gene expression was also lower in skin (Table S2), partly because most of the snakeskin lesions  
336 are necrotic (29) and most of the transcripts isolated from the skin of infected snakes had fungal  
337 origins (Fig. S2; Table S2). Many of the upregulated genes were part of the immune response  
338 and stress response pathways, including *JCHAIN*, which links immunoglobulin antibodies or,  
339 *PSMB8* which is likely involved in the inflammatory response pathway (Table S4). *IGLV5*  
340 encodes the variable domain of the immunoglobulin light chains that participates in the antigen  
341 recognition. Transcription factors were also upregulated in the skin, such as *ATF3*, which binds  
342 to many genomic regions that contain genes involved in cellular stress responses.

343         Among the genes that were downregulated (Table S4), *WNT10B* gene is expressed in  
344 epidermal keratinocytes and plays crucial roles in regulating skin development and homeostasis  
345 (67). Additionally, downregulation of *PLGC2* is associated with immune system disorders (68)  
346 and *SYP* gene, which is linked to Ca<sup>2+</sup>-dependent neurotransmitter release, was also under  
347 expressed in skin. Variation in SY-like immunoreactivity is a marker for neuroendocrine cancers  
348 of the skin (69).

349         In skin, three modules were significantly correlated with infection status and contained  
350 genes involved in DNA damage repair, cell cycle regulation, and their associated metabolic  
351 pathways like nucleic acid metabolism (Fig. S9). The modules were enriched in DNA replication  
352 and DNA mismatch repair KEGG pathways (Figs. S10, S11). Expressed in the nucleus during  
353 DNA synthesis and mismatch repair, these pathways are essential mechanisms during cell  
354 division and proliferation. Dysregulation of these pathways lead to an increase in genome  
355 instability and is associated with human nonmelanoma skin cancer (70).

356 Our DEG analysis of skin tissues points towards the activation of the host immune  
357 response due to infection-induced stress and rapid skin regeneration through upregulation of  
358 DNA replication and DNA repair mechanisms.

359

### 360 **Lower temperature exacerbates chronic infection in internal organs**

361 Lastly, we wanted to identify if infected snakes at different temperatures showed  
362 different patterns of gene expression. Since we identified no DEGs due to interaction in skin  
363 (Fig. 2C), we focused on liver and kidney tissues. A total of 91 genes were differentially  
364 expressed in liver of infected snakes due to higher temperature, of which 41 were upregulated  
365 (45%) and 50 were downregulated (55%; Fig.5A). Functional enrichment analysis showed  
366 fibrinolysis pathways were upregulated in infected snakes at higher temperature (Fig. 5B).  
367 Fibrinolysis is the enzymatic breakdown of fibrins in blood clots. This indicates that at the lower  
368 temperature, blood coagulation processes do not stop in the livers of infected snakes, which  
369 could potentially lead to fibrosis. Most of the downregulated processes in liver due to interaction  
370 were organic hydroxy-compounds metabolic processes, possibly playing a role in alcohol  
371 metabolism (Fig. 5C) and thus, adding to already lowered protein metabolism due to SFD (Fig.  
372 3).

373 In kidney tissues, we identified 67 DEGs due to interaction between treatment and  
374 temperature, of which 56 genes (84%) were upregulated and 11 (16%) genes were  
375 downregulated (Fig. 5A). Upregulated genes in infected snakes at the higher temperature were  
376 involved in response to xenobiotics and metabolism of ether lipids (Fig. 5D). Ether  
377 phospholipids metabolism is a signature of the return of blood flow to a particular organ and  
378 leads to reduction in cell death following acute kidney injury (71). Pro-inflammatory responses

379 like production of macrophage inflammatory proteins and chemokines, and neutrophil and  
 380 myeloid leukocyte migration were downregulated in infected snakes at the higher temperature  
 381 (Fig. 5E). This means that infected snakes at the higher temperature showed possible signs of  
 382 recovery with blood recirculation and reduced inflammatory responses.

383 Temperature played a crucial role in overall host response to *O. ophidiicola* infection  
 384 (Fig.1) as all the infected snakes at the lower temperature were euthanized due to more severe  
 385 clinical signs, whereas, most infected snakes at the higher temperature survived the experiment  
 386 (Table S1). Our DGE analysis to assess the effect of temperature on gene expression suggest that  
 387 infected snakes at the lower temperature were more susceptible to mortality because of multiple  
 388 organ failure due to chronic infections. A negative feedback loop of higher blood coagulation  
 389 and unchecked wound-healing can lead to permanent scarring and liver failure, while, prolonged  
 390 kidney inflammation can induce irreversible tubular injury and nephron failure.

391

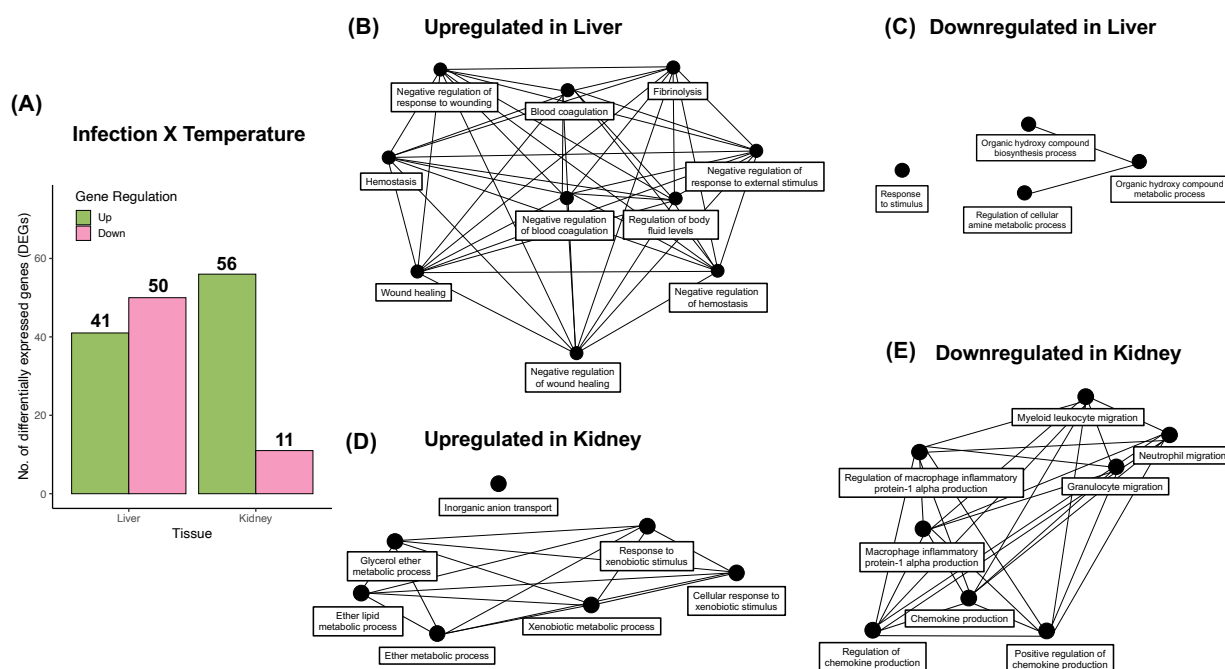

392

393 **Fig 5. Differential expression due to interaction effect of higher temperature on infected**  
394 **snakes.** (A) Differentially expressed genes (DEGs) in liver and kidney due to interaction  
395 between infection and higher temperature. Number above bars represent number of upregulated  
396 (green) and downregulated (pink) genes in each tissue. (B-E) Biological pathway networks for  
397 genes that were (B) upregulated in liver, (C) downregulated in liver, (D) upregulated in kidney,  
398 and (E) downregulated in kidney of infected snakes at the higher temperature as compared to  
399 infected snakes at the lower temperature. Biological pathway networks show relationship  
400 between enriched pathways (black nodes) connected by edges based on percentage of genes  
401 shared between a pair of GO:BP terms. Thicker edges represent more overlap of genes between a  
402 pair of GO term.

403

#### 404 **Identification of potential SFD host response loci**

405 Differential expression not only identifies a gene's involvement in host response but also  
406 the potential contribution of products of that gene to disease resistance or susceptibility (e.g.,  
407 immune genes). With the goals of characterizing potential SFD response loci in snakes we  
408 identified a total of 906 genes that were differentially regulated in at least one tissue we analyzed  
409 either due to *O. ophidiicola* infection only or due to the interaction between infection and  
410 temperature (Data S2). Within the 906 DEGs, there are 7700 exons (total length = 1,929,670 bp)  
411 in the *C. viridis* reference genome. We found 2,354 non-synonymous SNPs within the exons of  
412 DEGs that were polymorphic within the set of *C. viridis* genomes and all analyzed genomes had  
413 high diversity within these functional loci (mean heterozygosity = 0.187; SD = 0.032; Fig. S12).  
414 Though gene regulation is mostly controlled by transcription factors, sequence variation within  
415 protein coding regions is also often associated with disease susceptibility (14, 72) partly due to  
416 complex molecular co-evolution of host-pathogen system (73). Thus, these functional variants  
417 could underpin variability in host response and thus carry utility as diagnostic markers for SFD  
418 susceptibility in wild snake populations and species.

419

## 420 **Discussion**

### 421 **Insights into SFD Host Pathology from Gene Expression Data**

422 In terms of pathology, all wildlife fungal diseases studied to date have skin lesions as a  
423 characteristic symptom of infection (3, 6, 29) and are most likely transmitted via contact with  
424 other infected individuals (9) and/or contaminated environmental components such as soil (29)  
425 or water (6). However, despite these fungi infecting host skin epithelial cells, host response is  
426 different depending on the specific disease. For example, multiple studies involving *Bd* have  
427 confirmed an acute immune response in skin (74-76) and hinted that the early host response  
428 might be more beneficial for resistance to *Bd* infection (76). On the contrary, *P. destructans*  
429 infections on nose, wing and tail tissues in bats causes mortality as a result of a cascade of  
430 largely internal physiological changes including skin damage, dehydration, energy depletion, and  
431 higher CO<sub>2</sub> levels in blood (77).

432 Our gene expression results from multiple tissues indicate that *O. ophidiicola* infection  
433 causes chronic inflammation in internal organs which damages tissues over time and disrupts  
434 normal organ physiology like protein metabolism and electrolyte balance. Our study corroborates  
435 previous expectations of SFD being a systemic disease (29) with chronic *O. ophidiicola*  
436 infections, as opposed to direct fungal damage on infected skin (41). This argues that *O.*  
437 *ophidiicola* pathogenesis is more similar to *P. destructans* infections in white nose syndrome  
438 where long-term exposure leads to chronic respiratory acidosis, and *O. ophidiicola* may infect  
439 the host in multiple stages to cause multiple organ failure and eventual mortality (77). We argue  
440 that a better understanding of host-pathogen interaction on snake tissues using in-vitro (e.g.(78,  
441 79)) or in-vivo techniques (e.g. (75)) might reveal more information on the complete model of *O.*  
442 *ophidiicola* pathogenesis within a snake host.

443 More specifically, the gene expression data from skin tissue demonstrated certain  
444 similarities and differences between *Bd*, *P. destructans*, and *O. ophidiicola* infections. First, we  
445 found *O. ophidiicola* gene expression exclusively on skin (Fig. S2) and identified the expression  
446 of genes involved in hyphal growth. Necrosis on skin cell due to penetration of fungal hyphal  
447 into the epidermis have been confirmed in many SFD studies (29, 30, 80) and is the mode of *P.*  
448 *destructans* pathogenesis in white nose syndrome (9). Identifying functional genes within *O.*  
449 *ophidiicola* genome and quantifying their expression on snakeskin would help researchers  
450 identify pathogenesis mechanisms and potential deterrents against the pathogen. Comparative  
451 analysis of functional genes among different *O. ophidiicola* strains might also highlight the  
452 fungal origins and differences in virulence among lineages (7).

453 Second, we found the least amount of differential gene expression between infected and  
454 control snakes in skin tissue (Fig. 2). This was unexpected when compared to *Bd* as differential  
455 skin response is a major factor in determining host susceptibility to *Bd* (13) in many amphibian  
456 species (14, 18). This difference may be due to the fact that skin plays a major role in amphibian  
457 biology as it regulates osmosis and gas exchange which gets compromised and leads to death  
458 from cardiac arrest (8). Much of *O. ophidiicola* infected skin is necrotic (30) possibly  
459 terminating the gene expression of host cells. Lastly, we found over-expression of immune  
460 response and DNA damage repair genes in the skin tissues of infected snakes, which matches  
461 pro-inflammatory and skin integrity maintenance processes described in *Bd* and white nose  
462 syndrome studies (reviewed in (9, 13)). Snakes with SFD have been observed to shed more  
463 frequently (30, 81) possibly as a defense mechanism to reduce fungal load. We propose that SFD  
464 susceptibility could vary with host skin conditions and that inherent differences in snake skin  
465 (like the microdiversity) among different species/populations (81) might play a crucial role in

466 identifying vulnerable populations for conservation. Future research should consider comparing  
467 host skin gene expression profiles in response to SFD across multiple snake species.

468 SFD studies in free ranging and captive snakes have documented behavioral and  
469 physiological changes in infected snakes such as lethargy (80) and higher metabolic rates (82).  
470 Much of SFD-related mortality is attributed to less frequent foraging and anorexia (30).  
471 Starvation and anorexia cause liver injury with elevation of liver enzymes (83) and in agreement  
472 with the pro-inflammatory responses and higher metabolism we identified in liver tissues of *O.*  
473 *ophidiicola* infected snakes (Fig. 3). Similarly, within kidney tissues from infected snakes,  
474 reduced gene expression leads to electrolyte imbalance and loss of protein metabolism,  
475 potentially causing muscle atrophy and protein loss, and lack of liver-mediated toxin filtration  
476 (Fig. 4). Weak muscles, diseased liver, and renal failure result in lethargy in hosts and, in cases  
477 with chronic inflammation, could lead to increased impact of the disease and a higher risk of  
478 mortality.

479 Finally, SFD is difficult to diagnose in the wild (42) and our results suggest that possibly  
480 like as is the case of white nose syndrome, physiological impacts of SFD may start to cause  
481 deterioration of internal organs before clinical signs are manifested on the skin (77). A potential  
482 avenue for future research would be to study gene expression through time during early or late  
483 stages of *O. ophidiicola* infection to document changes before and after the onset of clinical  
484 signs. A time-course transcriptome analysis would indicate what biological changes occur when  
485 disease progresses, what genes are active at various stages of clinical signs, and what genetic and  
486 biological mechanisms underly host recovery. This can also help early diagnosis of infected  
487 snakes and identify possible genetic targets that determine host susceptibility to SFD.

488

## 489 **Effects of temperature**

490 Environmental temperature plays a crucial role in fungal pathogenesis and processes like  
491 reproduction, behavior, and immune response are temperature dependent in ectotherms (13).  
492 Many fungal species are most active at a specific range of temperatures (47) such as between 17-  
493 25°C for *Bd* (84) and thus, seasonality and environmental temperature are predictors of severity  
494 in this disease (48, 85, 86). Frogs prefer warmer temperatures or induce behavioral fever to  
495 increase immune response and survival during infection (87). Snakes also display behavioral  
496 thermogenesis through basking, which increases their body temperature to increase the immune  
497 response to infection (88, 89). Our results provide a link between these behaviors and a potential  
498 response to SFD infections in snakes. Warmer environmental temperatures raise the internal  
499 body temperature beyond the critical thermal maximum of the pathogenic fungi (90) and activate  
500 immune functions like leukocyte mobility and lymphocyte response to antigens in reptiles (91).  
501 Basking has been seen reported in free ranging snakes affected by SFD (44) and is possibly a  
502 defense mechanism against infection (29). Even in our controlled experiments, all infected  
503 snakes at the lower temperature displayed more severe disease, resulting in early euthanasia  
504 (Table S1) and carried the most unique gene expression profile (Fig. 1B-D). Our results suggest  
505 that more severe disease at the lower temperature was potentially due to poor immune response,  
506 resulting in liver fibrosis and acute kidney injury in chronically inflamed tissues. Infected snakes  
507 at the higher temperature may have recovered, as our results show gene expression profile  
508 similar to control snakes at the end of the study (Fig. 1B-D) including upregulation of genes that  
509 are associated with blood recirculation post-inflammation.

510 These results suggest that higher temperature is more suitable for recovery from SFD, but  
511 we acknowledge that we only analyzed expression profiles at a single timepoint after a



512 significant period of exposure to the disease. Hence, it is still unclear from this study whether the  
513 lack of fungal infection and no signatures of chronic tissue injury at the higher temperature is due  
514 to recovery or lack of severe infection through the course of the experiment. An experiment that  
515 quantifies the fungal transcripts (i.e. fungal gene expression) over time would indicate whether  
516 fungus proliferates as disease progresses and declines as host recovers, or if in some cases, the  
517 fungal growth is insufficient for severe disease development and hosts clear infection before  
518 before severe clinical signs increase the likelihood of mortality.

519

### 520 **Potential molecular markers for diagnosing SFD susceptibility**

521 Our inference about the physiological processes and biological pathways from  
522 differentially expressed genes was based on functions predicted from orthologs. A caveat with  
523 this approach is that GO terms are only available for small set of model organisms and functional  
524 impact of many species-specific genes not identified in the genome annotation of the model  
525 organism are unknown. Relying on functional information of homologous genes in related  
526 species (*Anolis carolinensis* in this study) does yield a comprehensive inventory of genes and  
527 their functional involvement in disease response.. For example, skin integrity genes are  
528 upregulated in *Bd*-resistant species (18, 74) and downregulated in *Bd*-susceptible species (74)  
529 across multiple studies (13).

530 *O. ophidiicola* is a generalist pathogen which is capable of infecting numerous snake  
531 species across the phylogeny (31, 33, 92). We acknowledge that the physiological response to  
532 this pathogen may vary among different host snake species, but we suspect that the biological  
533 mechanisms underlying host response (like immune activation, metabolism, etc.) would be  
534 similar among different snake species. Our curated set of genes (Data S1-2) can be used to

535 compare vulnerability to SFD in different species, specifically how changes in gene expression  
536 and/or certain polymorphisms are associated with SFD response. For example, the link between  
537 lower acquired immune gene expression and *Bd* survival has been observed in many amphibian  
538 species (14, 93). and specific genotypes can be associated with disease resistance (14, 72).  
539 Differences in allele specific variation in expression (94) or genotype association due to host-  
540 pathogen co-evolution like MHC allelic associations observed in case of amphibians exposed to  
541 *Bd* (14, 72) or natural populations of bananaquits with chronic avian malaria (95) can be  
542 leveraged to assess genetic vulnerability to pathogenic diseases. *O. ophiodiicola* has likely been  
543 prevailing in nature longer than previously expected (36) and thus, certain snake species could  
544 possibly have evolved to resist fungal infection due to long-term pathogenic pressure. Thus,  
545 comparing variation in sequence diversity and/or expression profiles of candidate genes among  
546 host populations and species host can help conservation biologist provide diagnostic capability to  
547 identify vulnerable populations most likely to succumb to SFD.

548

## 549 **Conclusion**

550 Ophidiomycosis (snake fungal disease; SFD) is a recently identified fungal disease and a  
551 potential threat to ecologically and phylogenetically diverse snake species. Our transcriptomic  
552 results demonstrate that similar to white nose syndrome in bats and in contrast to  
553 chytridiomycosis in amphibians, SFD is also a systemic disease. Fungal infections were localized  
554 to the skin, as expected, but most physiological changes occurred due to chronic inflammation in  
555 the internal organs. Temperature played an important role as infected snakes maintained at the  
556 lower temperature had higher mortality and a unique gene expression profile; this suggests that  
557 higher temperatures possibly aid in recovery from the disease. Future research should use multi-

558 omic approaches to determine whether different *O. ophiodiicola* strains produce similar impacts  
559 among snakes and whether different snake species and populations vary in their response to  
560 SFD. Finally, our study reports a set of candidate genes and functional loci that carry  
561 significance in improving our understanding of host-pathogen dynamics in multiple species and  
562 can help diagnose and mitigate SFD in wild and captive snakes.

563

## 564 **Materials and Methods**

### 565 **Controlled experiment varying infection status and temperature**

566 Twelve adult prairie rattlesnakes (*Crotalus viridis*) were evenly divided and maintained at 20°C  
567 or 26°C following a two-week acclimatization period. These temperatures were chosen as  
568 possible ends of the *O. ophiodiicola* thermal optimum ((31); thermal optimum for *Bd* is 17-25°C  
569 (81)). Four animals at each temperature condition were randomly selected for experimental  
570 challenge while two animals were maintained as controls (Fig. 1A). All snakes were free of  
571 clinical signs before inoculation based on criteria previously described (96). All snakes were  
572 offered pre-killed mice every 1–2 weeks and water was provided *ad libitum*. A pure *O.*  
573 *ophiodiicola* isolate (UI-VDL # 12–34933) cultured from an eastern massasauga (*Sistrurus*  
574 *catenatus*) was injected intradermally (0.1 ml of a pure culture containing 109,000 CFUs). The  
575 control animals were inoculated with a similar volume of sterile saline. All injections were  
576 performed over the dorsal mid-body of each snake. The experiment was conducted for 90 days  
577 post infection (dpi) and snakes were euthanized at the end of the study or earlier in case of severe  
578 disease mortality by complete anesthesia with ketamine intramuscularly, followed by sodium  
579 pentobarbital intravenously. All procedures were approved by the University of Illinois

580 Institutional Animal Care and Use Committee (IACUC; Protocol: 19165). However, during the  
581 experiment, one of the infected snakes at the higher temperature had to be prematurely  
582 euthanized before tissues could be extracted. Each animal was subjected to necropsy  
583 examination separately to collect samples of liver, kidney and skin. RNA was extracted using  
584 Qiagen RNEasy kit according to the manufacturer's recommendations (Qiagen RNEasy,  
585 Valencia, CA). RNA samples were analyzed using spectrophotometry (NanoDrop 1000, Thermo  
586 Fisher) to quantify concentration and purity, then stored at  $-80^{\circ}\text{C}$ . Reverse transcription was  
587 performed using the Quantitect Reverse Transcription kit (Qiagen, Valencia, CA) following  
588 manufacturer's protocol. The cDNA was submitted to the Keck Biotechnology Center at the  
589 University of Illinois for further processing.

590

### 591 **Construction and sequencing of RNAseq libraries**

592 RNAseq libraries were prepared for each sample with Illumina's TruSeq Stranded  
593 mRNAseq Sample Prep kit and paired-end (PE) reads (2x150bp) were sequenced on SP-lane of  
594 Illumina NovaSeq 6000 sequencer at the University of Illinois Roy Carver Genome Center.  
595 Following sequencing, we removed 1 skin and 1 liver sample due to low number of raw  
596 sequences generated. Ultimately, we analyzed sequence data from 10 liver, 11 kidney, and 10  
597 skin tissues from each snake with different temperature condition and infection status (Fig. 1A;  
598 Table S1).

599

### 600 **Sequence processing and expression quantification**

601 We removed adapter sequences and clipped poor-quality bases (quality score  $< 20$ ) from  
602 both ends of raw reads from the sequencer using Trimmomatic (97), aligned filtered reads to the

603 annotated *C. viridis* reference genome (UTA\_CroVir\_3.0; GenBank assembly accession:  
604 GCA\_003400415.2) using hisat2 (98) with the *-downstream-transcriptome-assembly* option and  
605 reporting primary alignments. We next assembled transcripts for each sample using StringTie  
606 (99) default parameters and *C. viridis* reference annotation file to guide assembly and merged  
607 sample transcripts using StringTie. Next, a transcript count matrix was next created with  
608 featureCounts (100) which excluded chimeric fragments and only retained mapped fragments in  
609 which both read pairs successfully aligned to the reference. We only counted reads that matched  
610 to the exons present in the merged annotation file. Ultimately, we generated a table of the count  
611 data which reports, for each sample, the number of sequence fragments that were assigned to  
612 each transcript.

613 To identify the number of total transcripts from snake tissues that had fungal origins, we  
614 mapped the aligned filtered reads to *O. ophidiicola* reference genome (GenBank assembly  
615 accession GCA\_002167195.1) using hisat2. We expect that tissues where fungus is actively  
616 present would have more expression of fungal transcripts and thus would have higher alignment  
617 rate to the *O. ophidiicola* reference genome.

618

## 619 **Differential gene expression analysis**

620 We conducted differential gene expression (DGE) analyses from the counts of all  
621 assembled transcripts (N = 107,167) for each tissue separately using DESeq2 (101) in R (102)  
622 following the workflow as described by the authors (101, 103). Our statistical model used a  
623 multi-factor design that included both main factors and an interaction term. The main factors  
624 were temperature (“Temperature”; low [20°C] vs. high [26°C]) and infection status (“Infection”;  
625 *O. ophidiicola* infected vs. control) and an interaction terms that measures an interaction effect

626 between temperature and infection (Infection X Temperature) (Fig. 1A). By analyzing genes  
627 showing differential gene expression due to each of the main factors and the interaction term, we  
628 were able to identify genes with differential expression purely due to the effect of treatment,  
629 temperature, or the interaction between these factors (Fig. S4).

630 To quantify if there was any difference in gene expression between treated tissues due to  
631 differences in temperatures, we used *contrast* function in DESeq2. To remove potential false  
632 positives due to low expression, we applied independent filtering to remove transcripts with low  
633 read counts and only considered transcripts with a false discovery rate (FDR) adjusted p-value of  
634 <0.05 to be differentially expressed. Finally, we transformed log fold change data using  
635 “adaptive shrinkage” from *ashr* package (104) in R to shrink the change in expression to only  
636 retain differentially expressed genes (DEGs) that are most biologically significant.

637

### 638 **Weighted gene co-expression network analysis**

639 Besides identifying individual genes that showed differential expression in each tissue  
640 due to differences in treatment and temperature conditions, we also identified networks of  
641 differentially co-expressed genes (termed “modules”) from the normalized counts of all  
642 expressed genes (105). Estimating co-expression patterns can provide insights into the biological  
643 processes that underlie the complex cascade of events that lead to the phenotypic differences  
644 observed due to different treatment effects (106). The nodes of these co-expression gene  
645 networks correspond to gene expression profiles, and edges between genes are determined by the  
646 pairwise correlations between the level of expression of each gene (105).

647 We used weighted gene co-expression network analysis (WGCNA) (107) to cluster  
648 highly correlated genes into different modules and to then quantify the relationship of different

649 modules with each other and to the temperature and infection treatments following the workflow  
650 described by the authors  
651 (<https://horvath.genetics.ucla.edu/html/CoexpressionNetwork/Rpackages/WGCNA/Tutorials/index.html>;  
652 [ex.html](https://horvath.genetics.ucla.edu/html/CoexpressionNetwork/Rpackages/WGCNA/Tutorials/index.html); last accessed 03/15/2022). We first identified modules of co-expressed genes by  
653 calculating pairwise Pearson correlations between each pair of genes with non-zero expression in  
654 at least 8 of our samples in each tissue separately ( $N_{\text{genes\_liver}} = 45,021$ ;  $N_{\text{genes\_kidney}} = 47,522$ ;  
655  $N_{\text{genes\_skin}} = 44,807$ ). We then merged modules that were correlated to each other with  $R^2 > 0.75$   
656 to get a final set of merged modules. Modules were identified by hierarchical clustering of signed  
657 Topological Overlap Matrix (TOM) (108) using a soft threshold ( $\beta$ ) to assign a connection  
658 weight to each gene pair and minimum 30 co-expressed genes to be assigned to a module  
659 following (109).  $\beta$  was chosen as the lowest power for which the scale-free topology fit index of  
660 all genes reached 0.9 within each tissue type ( $\beta_{\text{liver}} = 12$ ;  $\beta_{\text{kidney}} = 8$ ;  $\beta_{\text{skin}} = 12$ ) as suggested by  
661 the authors of WGCNA.

662       Next, we identified modules that were significantly associated ( $P < 0.05$  after applying  
663 false discovery rate method to correct for multiple testing) with the external temperature and  
664 infection treatments. We only retained modules that were significantly correlated to (a) either  
665 infection or (b) both infection and temperature. Within each significant module, we also  
666 identified the module membership and gene significance for each gene within the module.  
667 Module membership measures correlation between a gene's expression profile with the module  
668 eigengene of a given module. Highly connected genes within a module are more likely to have  
669 higher module membership values to the respective module. Gene significance is the measure of  
670 correlation of a gene with an external treatment factor (infection and temperature) and indicates  
671 the biological significance of a module gene with respect to the fixed effects of our experimental

672 design. For many of our final modules, genes with higher module membership had a positive and  
673 significant correlation with gene significance meaning that highly connected genes within a  
674 module are more likely to be associated with experimental treatments. Finally, we matched the  
675 genes belonging to final set of modules and were also differentially expressed due to the  
676 infection treatment only.

677

### 678 **Functional enrichment analysis**

679 For each module that was significantly associated with treatment each tissue and DEGs,  
680 we performed a functional enrichment analysis to identify which biological process gene  
681 ontology (GO:BP) terms and KEGG pathways were overrepresented in those gene clusters, as  
682 compared to the genome-wide GO complements of *Anolis carolinensis*. We performed GO  
683 enrichment analysis for all DEGs that were upregulated or downregulated within each tissue  
684 separately. We first converted candidate annotated genes in *C. viridis* genome to *A. carolinensis*  
685 Ensembl IDs using DAVID (110, 111) and performed functional enrichment analysis using  
686 gProfiler (112). We used g:SCS method (significance threshold  $< 0.05$ ) for computing multiple  
687 testing correction for p-values gained from GO and pathway enrichment analysis to account for  
688 non-independence among multiple tests among GO terms (112). We then created phylogenetic  
689 trees and functional networks using ShinyGO (113) to visualize enriched pathways.

690

### 691 **Identification of potential SFD host response loci**

692 Finally, to identify potential SFD host response loci that could be used to assay possible  
693 disease susceptibility or resistance at the population and species level in snakes, we first  
694 combined all the DEGs within all the tissues (Data S2) and then extracted protein coding regions



695 (exons) within the DEGs using the *C. viridis* genome annotation (see above). Next, to look for  
696 non-synonymous mutations within DEGs that could be potential diagnostic markers, we first  
697 mapped 19 *C. viridis* genomes (BioProject No. PRJNA593834; SRA Nos. SRS5767847-59,  
698 SRS5767870, SRS5767880-85) to the reference genome and then, identified single nucleotide  
699 polymorphism (SNP) markers within DEG exons (see Supplementary Text S1 for details).

700

## 701 **Data Availability Statement**

702 The sequence datasets generated during the current study are available in NCBI's Short  
703 Read Archive BioProject Accession No. PRJNA817280, BioSample Accession Nos.  
704 SAMN26754183-4213 and SRA Accession Nos. SRR18361039-069. The scripts developed for  
705 analysis can be publicly accessed at <https://github.com/samarth8392/SFDTranscriptomics>.

706

## 707 **Acknowledgements**

708 This work was supported by the State Wildlife Grants Program, administered jointly by the US  
709 Fish and Wildlife Service and the Ohio Division of Wildlife, with funds provided by the Ohio  
710 Biodiversity Conservation Partnership between Ohio State University and the Ohio Division of  
711 Wildlife. HLG was also supported by National Science Foundation (USA) Grant DEB 1638872.  
712 We thank Allison Wright, Michelle Waligora, Kennymac Durante, and Kelcie Fredrickson for  
713 care of the rattlesnakes throughout the study. We thank Alvaro Hernandez and his team at Roy  
714 Carver Genomics Center at University of Illinois, Urbana Champaign for RNA sequencing  
715 services.

716

717 **Author Contributions**

718 **Conceptualization:** Samarth Mathur, Ellen Haynes, Matthew C. Allender, H. Lisle Gibbs

719 **Data curation:** Samarth Mathur, H. Lisle Gibbs

720 **Analysis:** Samarth Mathur

721 **Funding acquisition:** Matthew C. Allender, H. Lisle Gibbs

722 **Investigation:** Samarth Mathur, H. Lisle Gibbs

723 **Methodology:** Samarth Mathur, H. Lisle Gibbs

724 **Project administration:** H. Lisle Gibbs, Matthew C. Allender

725 **Resources:** H. Lisle Gibbs, Matthew C. Allender

726 **Visualization:** Samarth Mathur, H. Lisle Gibbs

727 **Writing – original draft:** Samarth Mathur, H. Lisle Gibbs.

728 **Writing – review & editing:** Samarth Mathur, Ellen Haynes, Matthew C. Allender, H. Lisle

729 Gibbs

730

731 **References**

- 732 1. Becker K, Hu Y, Biller-Andorno N. Infectious diseases – A global challenge. *International*  
733 *Journal of Medical Microbiology*. 2006;296(4-5):179-85.
- 734 2. Barroso P, Acevedo P, Vicente J. The importance of long-term studies on wildlife diseases  
735 and their interfaces with humans and domestic animals: A review. *Transboundary and Emerging*  
736 *Diseases*. 2020;68(4):1895-909.
- 737 3. Berger L, Speare R, Daszak P, Green DE, Cunningham AA, Goggin CL, et al.  
738 Chytridiomycosis causes amphibian mortality associated with population declines in the rain  
739 forests of Australia and Central America. *Proceedings of the National Academy of Sciences*.  
740 1998;95(15):9031-6.
- 741 4. Frick WF, Pollock JF, Hicks AC, Langwig KE, Reynolds DS, Turner GG, et al. An  
742 emerging disease causes regional population collapse of a common North American bat species.  
743 *Science*. 2010;329(5992):679-82.
- 744 5. Fisher MC, Garner TWJ. Chytrid fungi and global amphibian declines. *Nat Rev Microbiol*.  
745 2020;18(6):332-43.
- 746 6. Kilpatrick AM, Briggs CJ, Daszak P. The ecology and impact of chytridiomycosis: an  
747 emerging disease of amphibians. *Trends in Ecology & Evolution*. 2010;25(2):109-18.
- 748 7. Rosenblum EB, James TY, Zamudio KR, Poorten TJ, Ilut D, Rodriguez D, et al. Complex  
749 history of the amphibian-killing chytrid fungus revealed with genome resequencing data.  
750 *Proceedings of the National Academy of Sciences*. 2013;110(23):9385-90.
- 751 8. Voyles J, Young S, Berger L, Campbell C, Voyles WF, Dinudom A, et al. Pathogenesis of  
752 Chytridiomycosis, a Cause of Catastrophic Amphibian Declines. *Science*. 2009;326(5952):582-5.
- 753 9. Hoyt JR, Kilpatrick AM, Langwig KE. Ecology and impacts of white-nose syndrome on  
754 bats. *Nature Reviews Microbiology*. 2021;19(3):196-210.
- 755 10. Frick WF, Puechmaille SJ, Hoyt JR, Nickel BA, Langwig KE, Foster JT, et al. Disease  
756 alters macroecological patterns of North American bats. *Global Ecology and Biogeography*.  
757 2015;24(7):741-9.
- 758 11. Meteyer CU, Buckles EL, Blehert DS, Hicks AC, Green DE, Shearn-Bochsler V, et al.  
759 Histopathologic criteria to confirm white-nose syndrome in bats. *Journal of Veterinary Diagnostic*  
760 *Investigation*. 2009;21(4):411-4.
- 761 12. Arlettaz R, Reeder DM, Frank CL, Turner GG, Meteyer CU, Kurta A, et al. Frequent  
762 arousal from hibernation linked to severity of infection and mortality in bats with white-nose  
763 syndrome. *PLoS ONE*. 2012;7(6).
- 764 13. Zamudio KR, McDonald CA, Belasen AM. High variability in infection mechanisms and  
765 host responses: a review of functional genomic studies of amphibian chytridiomycosis.  
766 *Herpetologica*. 2020;76(2).
- 767 14. McDonald CA, Longo AV, Lips KR, Zamudio KR. Incapacitating effects of fungal  
768 coinfection in a novel pathogen system. *Mol Ecol*. 2020;29(17):3173-86.
- 769 15. Andre SE, Parker J, Briggs CJ. Effect of temperature on host response to *Batrachochytrium*  
770 *dendrobatidis* infection in the mountain yellow-legged frog (*Rana muscosa*). *Journal of Wildlife*  
771 *Diseases*. 2008;44(3):716-20.
- 772 16. Brannelly LA, Berger L, Marrantelli G, Skerratt LF. Low humidity is a failed treatment  
773 option for chytridiomycosis in the critically endangered southern corroboree frog. *Wildlife*  
774 *Research*. 2015;42(1).

- 775 17. Grogan LF, Robert J, Berger L, Skerratt LF, Scheele BC, Castley JG, et al. Review of the  
776 amphibian immune response to chytridiomycosis, and future directions. *Frontiers in Immunology*.  
777 2018;9.
- 778 18. Eskew EA, Shock BC, LaDouceur EEB, Keel K, Miller MR, Foley JE, et al. Gene  
779 expression differs in susceptible and resistant amphibians exposed to *Batrachochytrium*  
780 *dendrobatidis*. *Royal Society Open Science*. 2018;5(2):170910.
- 781 19. Sarmiento-Ramírez JM, Abella E, Martín MP, Tellería MT, López-Jurado LF, Marco A,  
782 et al. *Fusarium solani* is responsible for mass mortalities in nests of loggerhead sea turtle, *Caretta*  
783 *caretta*, in Boavista, Cape Verde. *FEMS Microbiology Letters*. 2010;312(2):192-200.
- 784 20. Kim K, Harvell CD. The rise and fall of a six-year coral-fungal epizootic. *The American*  
785 *Naturalist*. 2004;164(S5):S52-S63.
- 786 21. Schumacher J. Fungal diseases of reptiles. *Veterinary Clinics of North America: Exotic*  
787 *Animal Practice*. 2003;6(2):327-35.
- 788 22. Brown J, vanEngelsdorp D, Evans JD, Saegerman C, Mullin C, Haubruge E, et al. Colony  
789 collapse disorder: a descriptive study. *PLoS ONE*. 2009;4(8).
- 790 23. Anderson PK, Cunningham AA, Patel NG, Morales FJ, Epstein PR, Daszak P. Emerging  
791 infectious diseases of plants: pathogen pollution, climate change and agrotechnology drivers.  
792 *Trends in Ecology & Evolution*. 2004;19(10):535-44.
- 793 24. Brown JKM, Hovmøller MS. Aerial dispersal of pathogens on the global and continental  
794 scales and its impact on plant disease. *Science*. 2002;297(5581):537-41.
- 795 25. Fisher MC, Henk DA, Briggs CJ, Brownstein JS, Madoff LC, McCraw SL, et al. Emerging  
796 fungal threats to animal, plant and ecosystem health. *Nature*. 2012;484(7393):186-94.
- 797 26. Ghosh PN, Fisher MC, Bates KA. Diagnosing emerging fungal threats: A one health  
798 perspective. *Frontiers in Genetics*. 2018;9.
- 799 27. Williams E, Yuill T, Artois M, Fischer J, Haigh S. Emerging infectious diseases in wildlife.  
800 *Revue scientifique et technique-Office international des Epizooties*. 2002;21(1):139-58.
- 801 28. Daszak P, Cunningham AA, Hyatt AD. Emerging infectious diseases of wildlife-- threats  
802 to biodiversity and human health. *Science*. 2000;287(5452):443-9.
- 803 29. Lorch JM, Knowles S, Lankton JS, Michell K, Edwards JL, Kapfer JM, et al. Snake fungal  
804 disease: an emerging threat to wild snakes. *Philos Trans R Soc Lond B Biol Sci*. 2016;371(1709).
- 805 30. Lorch JM, Lankton J, Werner K, Falendysz EA, McCurley K, Blehert DS. Experimental  
806 infection of snakes with *Ophidiomyces ophiodiicola* causes pathological changes that typify snake  
807 fungal disease. *mBio*. 2015;6(6):e01534-15.
- 808 31. Allender MC, Raudabaugh DB, Gleason FH, Miller AN. The natural history, ecology, and  
809 epidemiology of *Ophidiomyces ophiodiicola* and its potential impact on free-ranging snake  
810 populations. *Fungal Ecology*. 2015;17:187-96.
- 811 32. Rajeev S, Sutton DA, Wickes BL, Miller DL, Giri D, Van Meter M, et al. Isolation and  
812 characterization of a new fungal species, *Chrysosporium ophiodiicola*, from a mycotic granuloma  
813 of a black rat snake (*Elaphe obsoleta obsoleta*). *J Clin Microbiol*. 2009;47(4):1264-8.
- 814 33. Burbrink FT, Lorch JM, Lips KR. Host susceptibility to snake fungal disease is highly  
815 dispersed across phylogenetic and functional trait space. *Sci Adv*. 2017;3(12):e1701387.
- 816 34. Allender MC, Dreslik M, Wylie S, Phillips C, Wylie DB, Maddox C, et al. *Chrysosporium*  
817 sp. Infection in eastern massasauga rattlesnakes. *Emerging infectious diseases*. 2011;17(12):2383-  
818 4.

- 819 35. Clark RW, Marchand MN, Clifford BJ, Stechert R, Stephens S. Decline of an isolated  
820 timber rattlesnake (*Crotalus horridus*) population: Interactions between climate change, disease,  
821 and loss of genetic diversity. *Biological Conservation*. 2011;144(2):886-91.
- 822 36. Lorch JM, Price SJ, Lankton JS, Drayer AN. Confirmed Cases of Ophidiomycosis in  
823 Museum Specimens from as Early as 1945, United States. *Emerg Infect Dis*. 2021;27(7):1986-9.
- 824 37. Sigler L, Hambleton S, Paré JA. Molecular characterization of reptile pathogens currently  
825 known as members of the chrysosporium anamorph of *Nannizziopsis vriesii* complex and  
826 relationship with some human-associated isolates. *Journal of Clinical Microbiology*.  
827 2013;51(10):3338-57.
- 828 38. Sun PL, Yang CK, Li WT, Lai WY, Fan YC, Huang HC, et al. Infection with *Nannizziopsis*  
829 *guarroi* and *Ophidiomyces ophiodiicola* in reptiles in Taiwan. *Transboundary and Emerging*  
830 *Diseases*. 2021.
- 831 39. Takami Y, Nam KO, Takaki Y, Kadekaru S, Hemmi C, Hosoya T, et al. First report of  
832 ophidiomycosis in Asia caused by *Ophidiomyces ophiodiicola* in captive snakes in Japan. *J Vet*  
833 *Med Sci*. 2021;83(8):1234-9.
- 834 40. Nichols DK, Weyant RS, Lamirande EW, Sigler L, Mason RT. Fatal mycotic dermatitis in  
835 captive brown tree snakes (*Boiga irregularis*). *J Zoo Wildl Med*. 1999;30(1):111-8.
- 836 41. Dolinski AC, Allender MC, Hsiao V, Maddox CW. Systemic *Ophidiomyces ophiodiicola*  
837 infection in a free-ranging plains garter snake (*Thamnophis radix*). *Journal of Herpetological*  
838 *Medicine and Surgery*. 2014;24(1).
- 839 42. Davy CM, Shirole L, Campbell D, Dillon R, McKenzie C, Nemeth N, et al. Revisiting  
840 ophidiomycosis (snake fungal disease) after a decade of targeted research. *Frontiers in Veterinary*  
841 *Science*. 2021;8.
- 842 43. Guthrie AL, Knowles S, Ballmann AE, Lorch JM. Detection of snake fungal disease due  
843 to *Ophidiomyces ophiodiicola* in virginia, usa. *Journal of Wildlife Diseases*. 2016;52(1):143-9.
- 844 44. McBride MP, Wojick KB, Georoff TA, Kimbro J, Garner MM, Wang X, et al.  
845 *Ophidiomyces ophiodiicola* dermatitis in eight free-ranging timber rattlesnakes (*Crotalus*  
846 *horridus*) from Massachusetts. *Journal of Zoo and Wildlife Medicine*. 2015;46(1):86-94.
- 847 45. McCoy CM, Lind CM, Farrell TM. Environmental and physiological correlates of the  
848 severity of clinical signs of snake fungal disease in a population of pigmy rattlesnakes, *Sistrurus*  
849 *miliarius*. *Conservation Physiology*. 2017;5(1).
- 850 46. Lind CM, McCoy CM, Farrell TM. Tracking outcomes of snake fungal disease in free-  
851 ranging pigmy rattlesnakes (*Sistrurus miliarius*). *Journal of Wildlife Diseases*. 2018;54(2):352-6.
- 852 47. Robert Vincent A, Casadevall A. Vertebrate endothermy restricts most fungi as potential  
853 pathogens. *The Journal of Infectious Diseases*. 2009;200(10):1623-6.
- 854 48. Rowley JJJ, Alford RA. Hot bodies protect amphibians against chytrid infection in nature.  
855 *Scientific Reports*. 2013;3(1).
- 856 49. Ghosh PN, Brookes LM, Edwards HM, Fisher MC, Jervis P, Kappel D, et al. Cross-  
857 disciplinary genomics approaches to studying emerging fungal infections. *Life*. 2020;10(12).
- 858 50. Andrianopoulos A, Tang G, Chen Y, Xu J-R, Kistler HC, Ma Z. The fungal myosin I is  
859 essential for *Fusarium* toxigenic formation. *PLOS Pathogens*. 2018;14(1).
- 860 51. Prostack SM, Robinson KA, Titus MA, Fritz-Laylin LK. The actin networks of chytrid fungi  
861 reveal evolutionary loss of cytoskeletal complexity in the fungal kingdom. *Current Biology*.  
862 2021;31(6):1192-205.e6.

- 863 52. Renshaw H, Juvvadi PR, Cole DC, Steinbach WJ. The class V myosin interactome of the  
864 human pathogen *Aspergillus fumigatus* reveals novel interactions with COPII vesicle transport  
865 proteins. *Biochemical and Biophysical Research Communications*. 2020;527(1):232-7.
- 866 53. Huang C, Feng Y, Patel G, Xu X-q, Qian J, Liu Q, et al. Production, immobilization and  
867 characterization of beta-glucosidase for application in cellulose degradation from a novel  
868 *Aspergillus versicolor*. *International Journal of Biological Macromolecules*. 2021;177:437-46.
- 869 54. Burnie JP, Carter TL, Hodgetts SJ, Matthews RC. Fungal heat-shock proteins in human  
870 disease. *FEMS Microbiology Reviews*. 2006;30(1):53-88.
- 871 55. Sherr CJ. Colony-stimulating factor-1 receptor. *Blood*. 1990;75(1):1-12.
- 872 56. Qin M, Liang Z, Qin H, Huo Y, Wu Q, Yang H, et al. Novel prognostic biomarkers in  
873 gastric cancer: CGB5, MKNK2, and PAPP2. *Frontiers in Oncology*. 2021;11.
- 874 57. Yang M, Ma F, Guan M. Role of steroid hormones in the pathogenesis of nonalcoholic  
875 fatty liver disease. *Metabolites*. 2021;11(5).
- 876 58. Scheller K, Sekeris CE. The effects of steroid hormones on the transcription of genes  
877 encoding enzymes of oxidative phosphorylation. *Experimental Physiology*. 2003;88(1):129-40.
- 878 59. Kersten S, Stienstra R. The role and regulation of the peroxisome proliferator activated  
879 receptor alpha in human liver. *Biochimie*. 2017;136:75-84.
- 880 60. Younossi ZM, Stepanova M, Afendy M, Fang Y, Younossi Y, Mir H, et al. Changes in the  
881 prevalence of the most common causes of chronic liver diseases in the United States from 1988 to  
882 2008. *Clinical Gastroenterology and Hepatology*. 2011;9(6):524-30.e1.
- 883 61. Lecker SH, Mitch WE. Proteolysis by the ubiquitin-proteasome system and kidney disease.  
884 *Journal of the American Society of Nephrology*. 2011;22(5):821-4.
- 885 62. Wang XH, Mitch WE. Mechanisms of muscle wasting in chronic kidney disease. *Nature*  
886 *Reviews Nephrology*. 2014;10(9):504-16.
- 887 63. Lameire N, Van Biesen W, Vanholder R. Electrolyte disturbances and acute kidney injury  
888 in patients with cancer. *Seminars in Nephrology*. 2010;30(6):534-47.
- 889 64. Kreidberg JA, Symons JM. Integrins in kidney development, function, and disease.  
890 *American Journal of Physiology-Renal Physiology*. 2000;279(2):F233-F42.
- 891 65. El Chediak A, Janom K, Koubar SH. Bile cast nephropathy: when the kidneys turn yellow.  
892 *Renal Replacement Therapy*. 2020;6(1).
- 893 66. Schardong J, Marcolino MAZ, Plentz RDM. Muscle atrophy in chronic kidney disease.  
894 *Advances in Experimental Medicine and Biology* 2018. p. 393-412.
- 895 67. Ouji Y, Yoshikawa M, Shiroy A, Ishizaka S. *Wnt-10b* promotes differentiation of skin  
896 epithelial cells in vitro. *Biochemical and Biophysical Research Communications*. 2006;342(1):28-  
897 35.
- 898 68. Zhou Q, Lee G-S, Brady J, Datta S, Katan M, Sheikh A, et al. A hypermorphic missense  
899 mutation in *PLCG2*, encoding phospholipase C $\gamma$ 2, causes a dominantly inherited  
900 autoinflammatory disease with immunodeficiency. *The American Journal of Human Genetics*.  
901 2012;91(4):713-20.
- 902 69. Hamie L, Abbas O, Bhawan J. Neuroendocrine differentiation of skin tumors: a  
903 comprehensive review. *The American Journal of Dermatopathology*. 2020;42(12):899-910.
- 904 70. Li G-M. Mechanisms and functions of DNA mismatch repair. *Cell Research*.  
905 2007;18(1):85-98.
- 906 71. Yan H-f, Zou T, Tuo Q-z, Xu S, Li H, Belaidi AA, et al. Ferroptosis: mechanisms and links  
907 with diseases. *Signal Transduction and Targeted Therapy*. 2021;6(1).

- 908 72. Savage AE, Zamudio KR. MHC genotypes associate with resistance to a frog-killing  
909 fungus. *Proceedings of the National Academy of Sciences*. 2011;108(40):16705-10.
- 910 73. Phillips KP, Cable J, Mohammed RS, Herdegen-Radwan M, Raubic J, Przesmycka KJ, et  
911 al. Immunogenetic novelty confers a selective advantage in host–pathogen coevolution.  
912 *Proceedings of the National Academy of Sciences*. 2018;115(7):1552-7.
- 913 74. Ellison AR, Tunstall T, DiRenzo GV, Hughey MC, Rebollar EA, Belden LK, et al. More  
914 than skin deep: functional genomic basis for resistance to amphibian chytridiomycosis. *Genome*  
915 *Biology and Evolution*. 2015;7(1):286-98.
- 916 75. Ellison AR, DiRenzo GV, McDonald CA, Lips KR, Zamudio KR. First in vivo  
917 *Batrachochytrium dendrobatidis* transcriptomes reveal mechanisms of host exploitation, host-  
918 specific gene expression, and expressed genotype shifts. *G3 Genes|Genomes|Genetics*.  
919 2017;7(1):269-78.
- 920 76. Grogan LF, Cashins SD, Skerratt LF, Berger L, McFadden MS, Harlow P, et al. Evolution  
921 of resistance to chytridiomycosis is associated with a robust early immune response. *Molecular*  
922 *Ecology*. 2018;27(4):919-34.
- 923 77. Verant ML, Meteyer CU, Speakman JR, Cryan PM, Lorch JM, Blehert DS. White-nose  
924 syndrome initiates a cascade of physiologic disturbances in the hibernating bat host. *BMC*  
925 *Physiology*. 2014;14(1).
- 926 78. Fites JS, Ramsey JP, Holden WM, Collier SP, Sutherland DM, Reinert LK, et al. The  
927 invasive chytrid fungus of amphibians paralyzes lymphocyte responses. *Science*.  
928 2013;342(6156):366-9.
- 929 79. Fisher MC, Rosenblum EB, Poorten TJ, Joneson S, Settles M. Substrate-specific gene  
930 expression in *Batrachochytrium dendrobatidis*, the chytrid pathogen of amphibians. *PLoS ONE*.  
931 2012;7(11).
- 932 80. McKenzie CM, Oesterle PT, Stevens B, Shirose L, Mastromonaco GF, Lillie BN, et al.  
933 Ophidiomycosis in red cornsnakes (*Pantherophis guttatus*): potential roles of brumation and  
934 temperature on pathogenesis and transmission. *Vet Pathol*. 2020;57(6):825-37.
- 935 81. Allender MC, Baker S, Britton M, Kent AD. Snake fungal disease alters skin bacterial and  
936 fungal diversity in an endangered rattlesnake. *Scientific Reports*. 2018;8(1).
- 937 82. Agugliaro J, Lind CM, Lorch JM, Farrell TM, Hawley D. An emerging fungal pathogen is  
938 associated with increased resting metabolic rate and total evaporative water loss rate in a winter-  
939 active snake. *Functional Ecology*. 2019;34(2):486-96.
- 940 83. Rosen E, Bakshi N, Watters A, Rosen HR, Mehler PS. Hepatic complications of anorexia  
941 nervosa. *Digestive Diseases and Sciences*. 2017;62(11):2977-81.
- 942 84. Piotrowski JS, Annis SL, Longcore JE. Physiology of *Batrachochytrium dendrobatidis*, a  
943 chytrid pathogen of amphibians. *Mycologia*. 2017;96(1):9-15.
- 944 85. Longo AV, Burrowes PA, Joglar RL. Seasonality of *Batrachochytrium dendrobatidis*  
945 infection in direct-developing frogs suggests a mechanism for persistence. *Diseases of Aquatic*  
946 *Organisms*. 2009;92(3):253-60.
- 947 86. Longo AV, Zamudio KR. Temperature variation, bacterial diversity and fungal infection  
948 dynamics in the amphibian skin. *Molecular Ecology*. 2017;26(18):4787-97.
- 949 87. Boltaña S, Rey S, Roher N, Vargas R, Huerta M, Huntingford FA, et al. Behavioural fever  
950 is a synergic signal amplifying the innate immune response. *Proceedings of the Royal Society B:*  
951 *Biological Sciences*. 2013;280(1766).
- 952 88. Burns G, Ramos A, Muchlinski A. Fever response in North American snakes. *Journal of*  
953 *Herpetology*. 1996;30(2).

- 954 89. Godwin CD, Walker DM, Romer AS, Grajal-Puche A, Grisnik M, Goessling JM, et al.  
955 Testing the febrile response of snakes inoculated with *Ophidiomyces ophidiicola*, the causative  
956 agent of snake fungal disease. *Journal of Thermal Biology*. 2021;100.
- 957 90. Zimmerman LM, Vogel LA, Bowden RM. Understanding the vertebrate immune system:  
958 insights from the reptilian perspective. *Journal of Experimental Biology*. 2010;213(5):661-71.
- 959 91. Vaughn LK, Bernheim HA, Kluger MJ. Fever in the lizard *Dipsosaurus dorsalis*. *Nature*.  
960 1974;252(5483):473-4.
- 961 92. Allender MC, Ravesi MJ, Haynes E, Ospina E, Petersen C, Phillips CA, et al.  
962 Ophidiomycosis, an emerging fungal disease of snakes: Targeted surveillance on military lands  
963 and detection in the western US and Puerto Rico. *Plos One*. 2020;15(10).
- 964 93. Savage AE, Gratwicke B, Hope K, Bronikowski E, Fleischer RC. Sustained immune  
965 activation is associated with susceptibility to the amphibian chytrid fungus. *Mol Ecol*.  
966 2020;29(15):2889-903.
- 967 94. Knight JC. Allele-specific gene expression uncovered. *Trends in Genetics*.  
968 2004;20(3):113-6.
- 969 95. Antonides J, Mathur S, Sundaram M, Ricklefs R, DeWoody JA. Immunogenetic response  
970 of the bananaquit in the face of malarial parasites. *BMC Evolutionary Biology*. 2019;19(1).
- 971 96. Baker SJ, Haynes E, Gramhofer M, Stanford K, Bailey S, Christman M, et al. Case  
972 definition and diagnostic testing for snake fungal disease. *Herpetological Review*. 2019;50(2):279-  
973 85.
- 974 97. Bolger AM, Lohse M, Usadel B. Trimmomatic: a flexible trimmer for Illumina sequence  
975 data. *Bioinformatics*. 2014;30(15):2114-20.
- 976 98. Kim D, Langmead B, Salzberg SL. HISAT: a fast spliced aligner with low memory  
977 requirements. *Nature Methods*. 2015;12(4):357-60.
- 978 99. Pertea M, Pertea GM, Antonescu CM, Chang T-C, Mendell JT, Salzberg SL. StringTie  
979 enables improved reconstruction of a transcriptome from RNA-seq reads. *Nature Biotechnology*.  
980 2015;33(3):290-5.
- 981 100. Liao Y, Smyth GK, Shi W. featureCounts: an efficient general purpose program for  
982 assigning sequence reads to genomic features. *Bioinformatics*. 2013;30(7):923-30.
- 983 101. Love MI, Huber W, Anders S. Moderated estimation of fold change and dispersion for  
984 RNA-seq data with DESeq2. *Genome Biol*. 2014;15(12):550.
- 985 102. Team RC. R: A language and environment for statistical computing. 2013.
- 986 103. Love M, Anders S, Kim V, Huber W. RNA-Seq workflow: gene-level exploratory analysis  
987 and differential expression. *F1000Research*. 2016;4(1070).
- 988 104. Stephens M. False discovery rates: a new deal. *Biostatistics*. 2016.
- 989 105. Zhang B, Horvath S. A general framework for weighted gene co-expression network  
990 analysis. *Statistical Applications in Genetics and Molecular Biology*. 2005;4(1).
- 991 106. Nacu S, Critchley-Thorne R, Lee P, Holmes S. Gene expression network analysis and  
992 applications to immunology. *Bioinformatics*. 2007;23(7):850-8.
- 993 107. Langfelder P, Horvath S. WGCNA: an R package for weighted correlation network  
994 analysis. *BMC Bioinformatics*. 2008;9(1).
- 995 108. Yip AM, Horvath S. Gene network interconnectedness and the generalized topological  
996 overlap measure. *BMC Bioinformatics*. 2007;8(1).
- 997 109. Harder AM, Willoughby JR, Ardren WR, Christie MR. Among-family variation in survival  
998 and gene expression uncovers adaptive genetic variation in a threatened fish. *Mol Ecol*.  
999 2020;29(6):1035-49.



- 1000 110. Huang DW, Sherman BT, Lempicki RA. Systematic and integrative analysis of large gene  
1001 lists using DAVID bioinformatics resources. *Nature Protocols*. 2008;4(1):44-57.
- 1002 111. Huang DW, Sherman BT, Lempicki RA. Bioinformatics enrichment tools: paths toward  
1003 the comprehensive functional analysis of large gene lists. *Nucleic Acids Research*. 2009;37(1):1-  
1004 13.
- 1005 112. Raudvere U, Kolberg L, Kuzmin I, Arak T, Adler P, Peterson H, et al. g:Profiler: a web  
1006 server for functional enrichment analysis and conversions of gene lists (2019 update). *Nucleic  
1007 Acids Research*. 2019;47(W1):W191-W8.
- 1008 113. Yao R, Jung D, Ge SX, Valencia A. ShinyGO: a graphical gene-set enrichment tool for  
1009 animals and plants. *Bioinformatics*. 2020;36(8):2628-9.
- 1010 114. Luo W, Pant G, Bhavnasi YK, Blanchard SG, Brouwer C. Pathview Web: user friendly  
1011 pathway visualization and data integration. *Nucleic Acids Research*. 2017;45(W1):W501-W8.
- 1012
- 1013

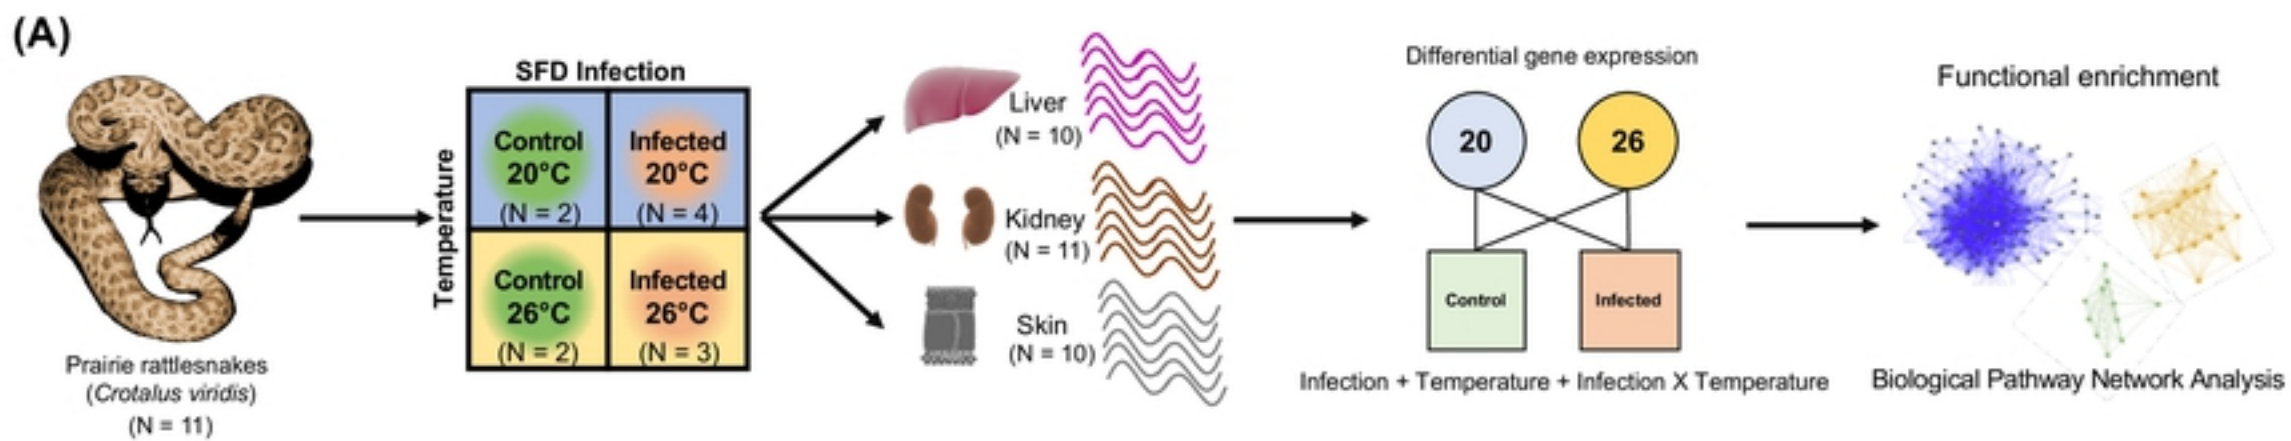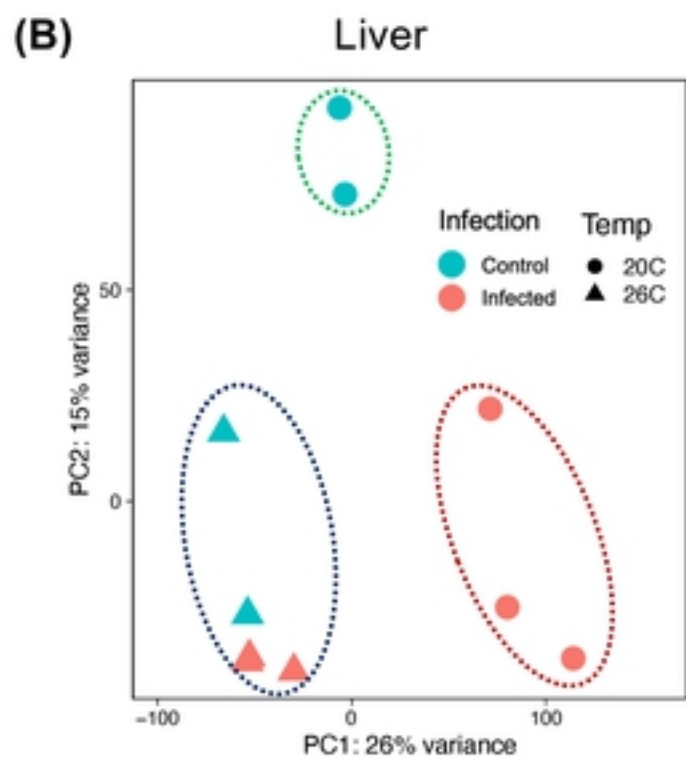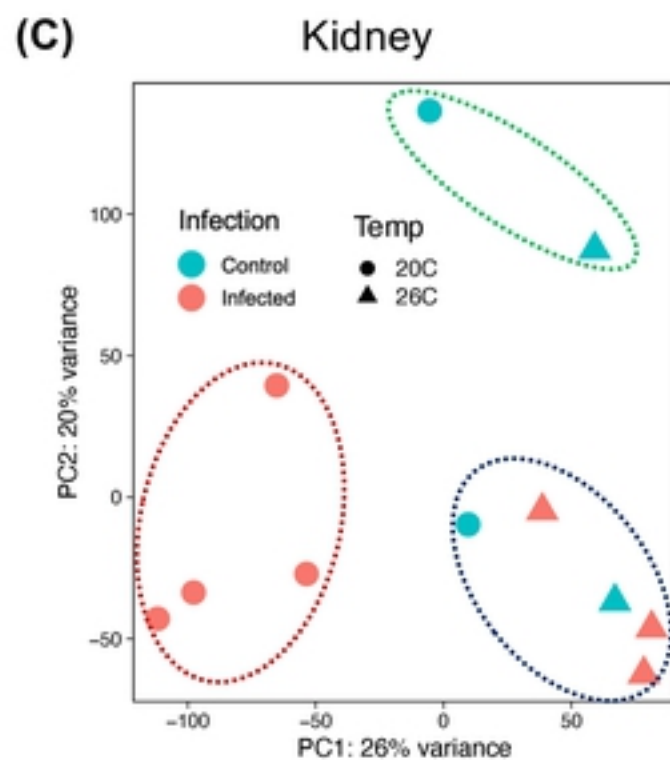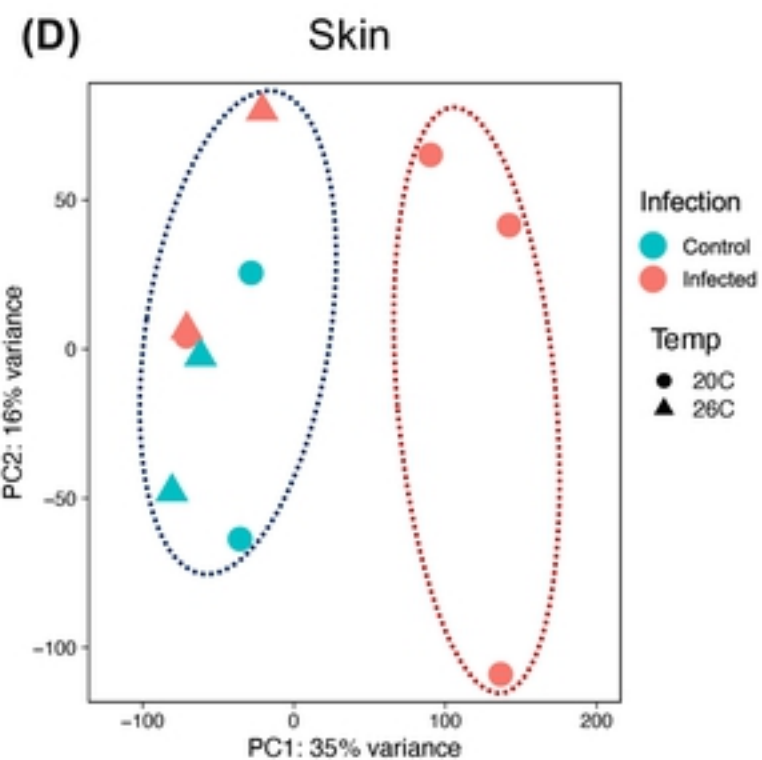

Figure 1

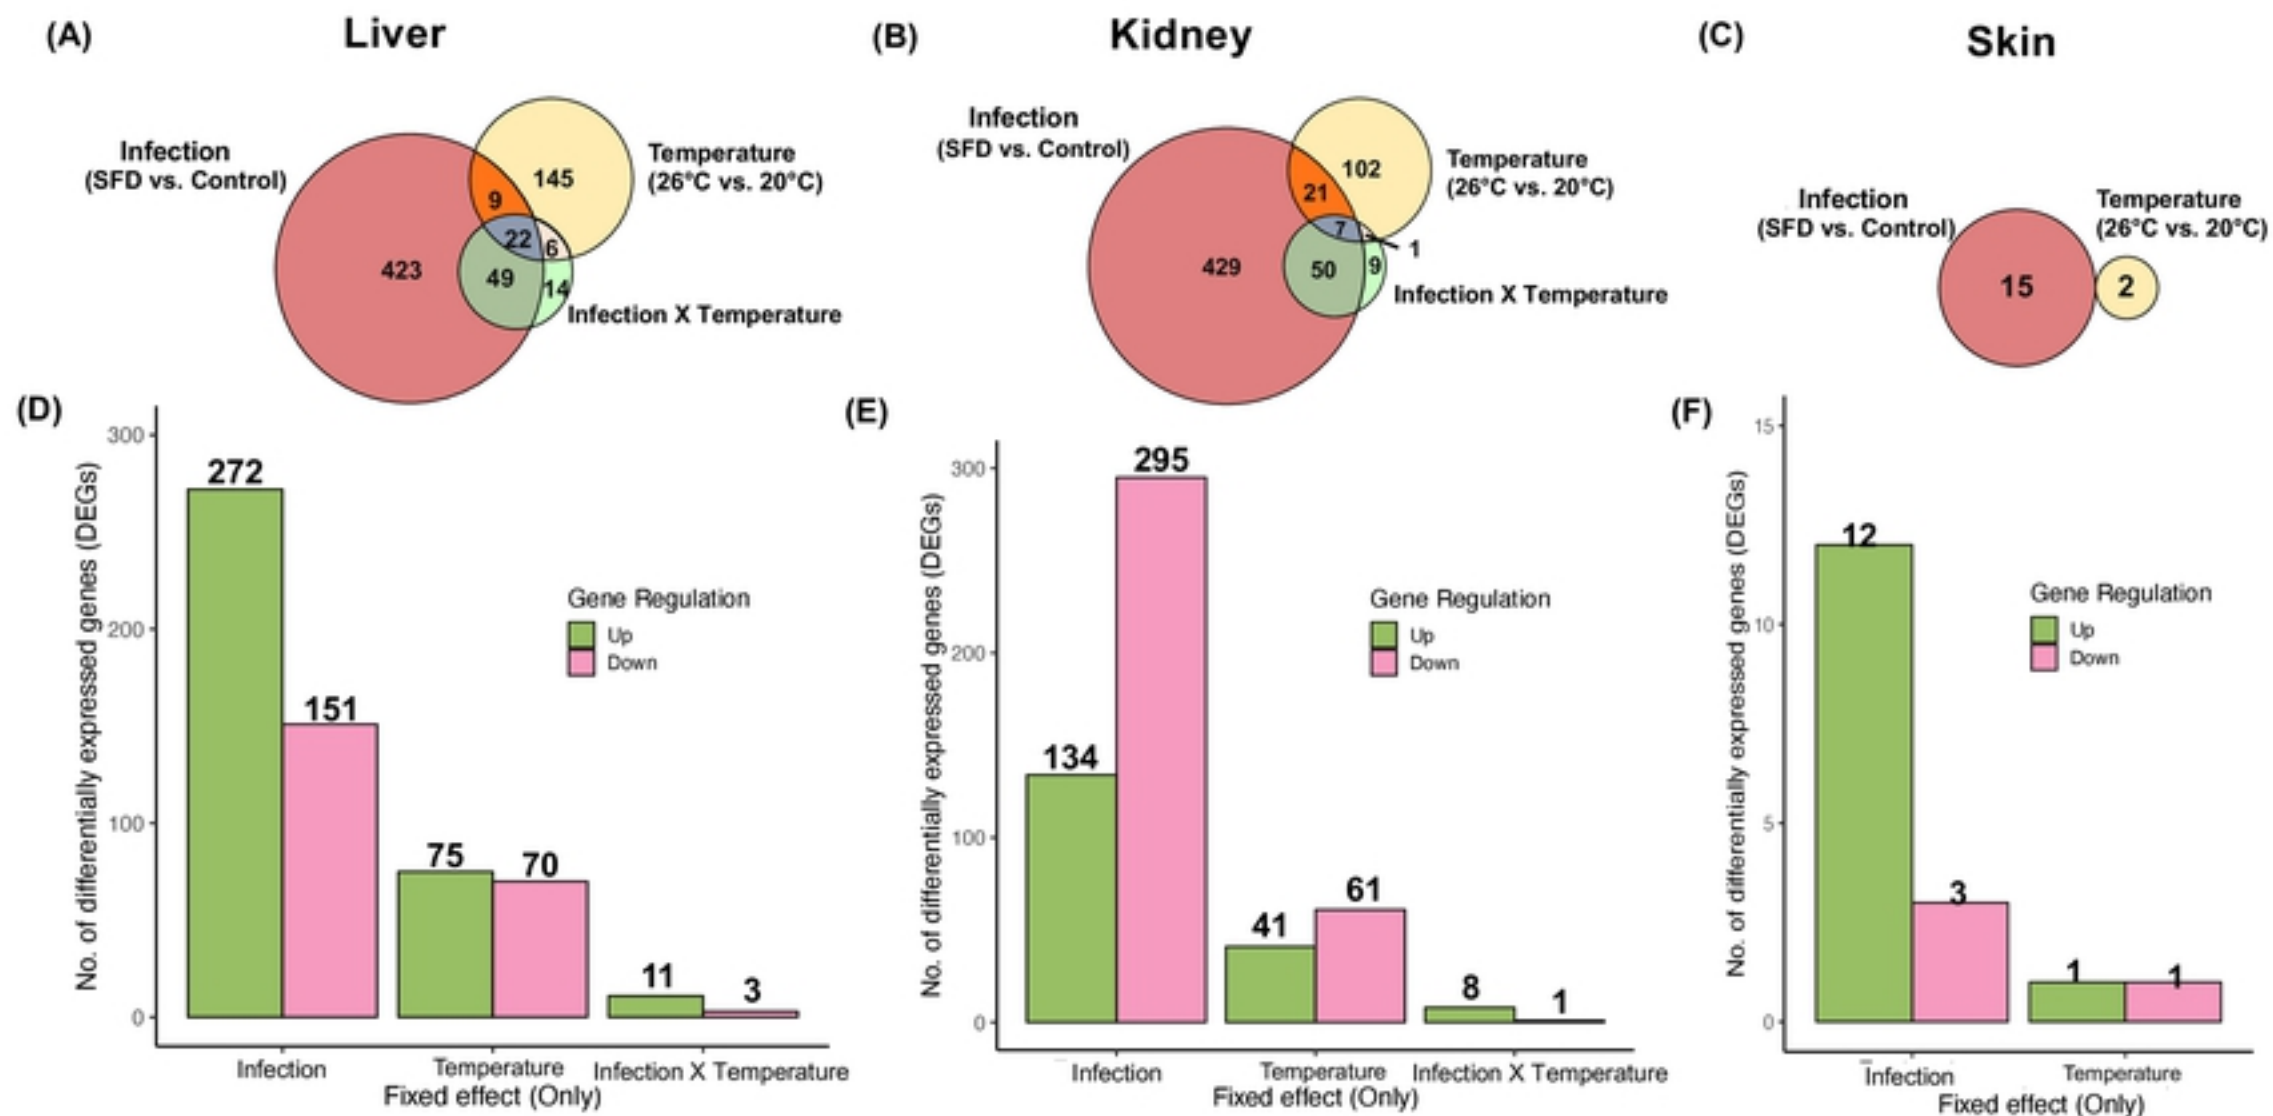

Figure 2

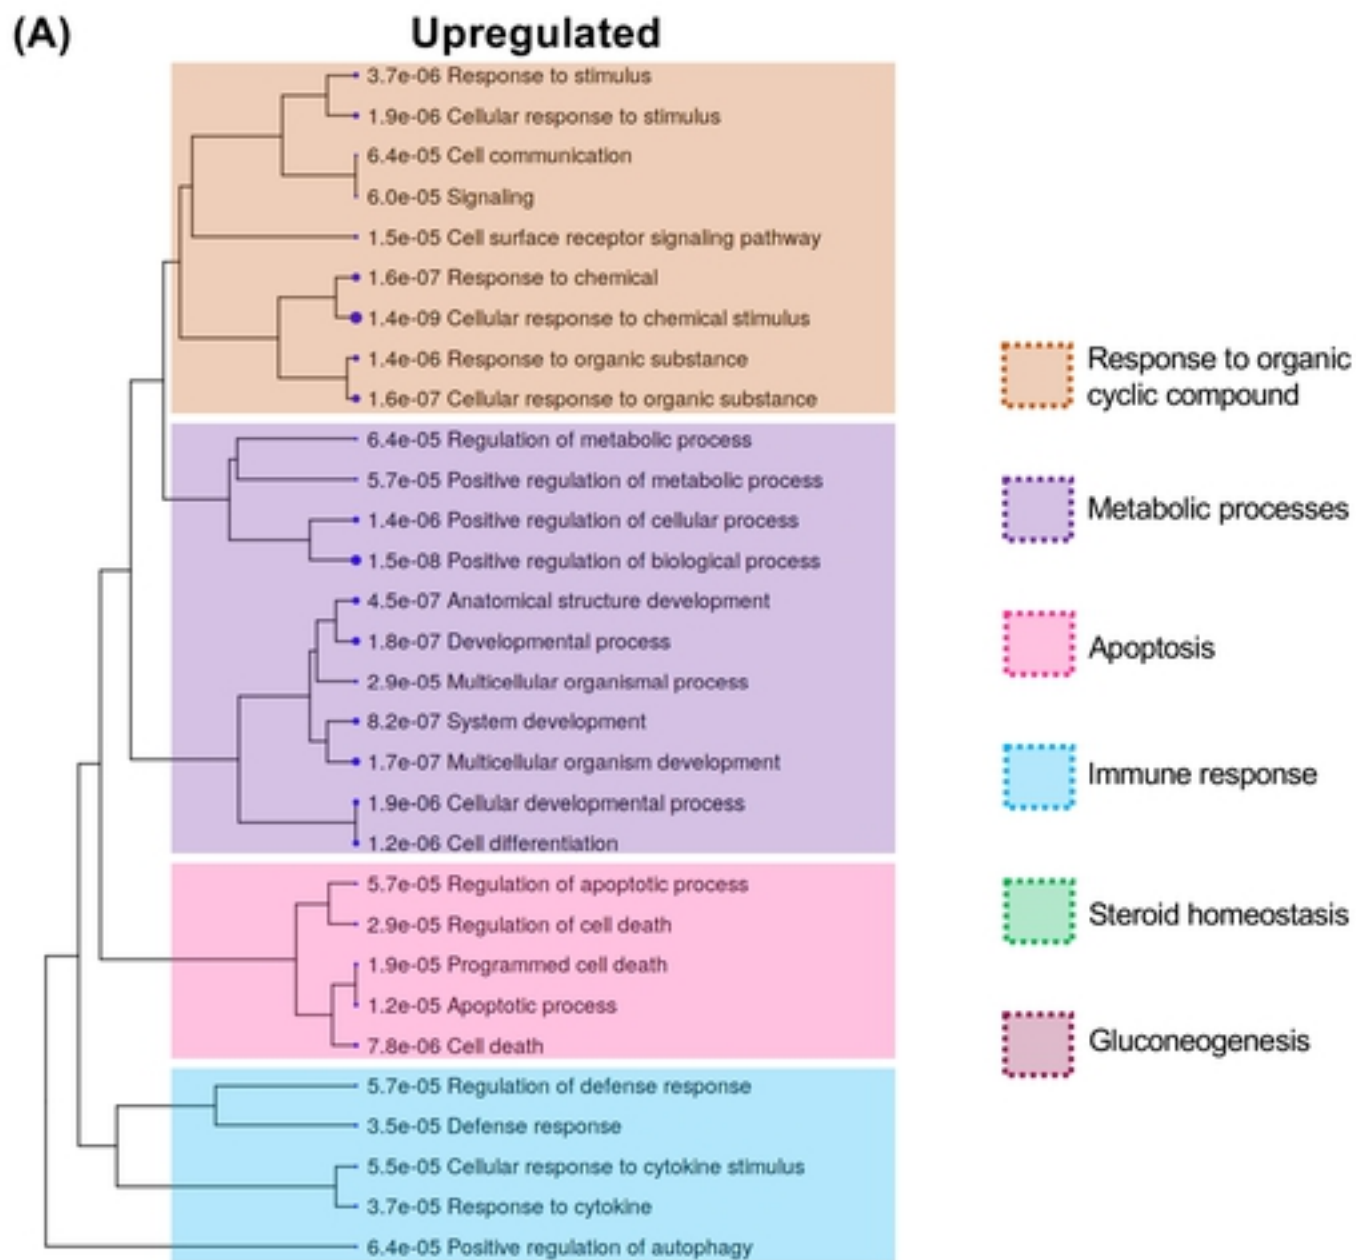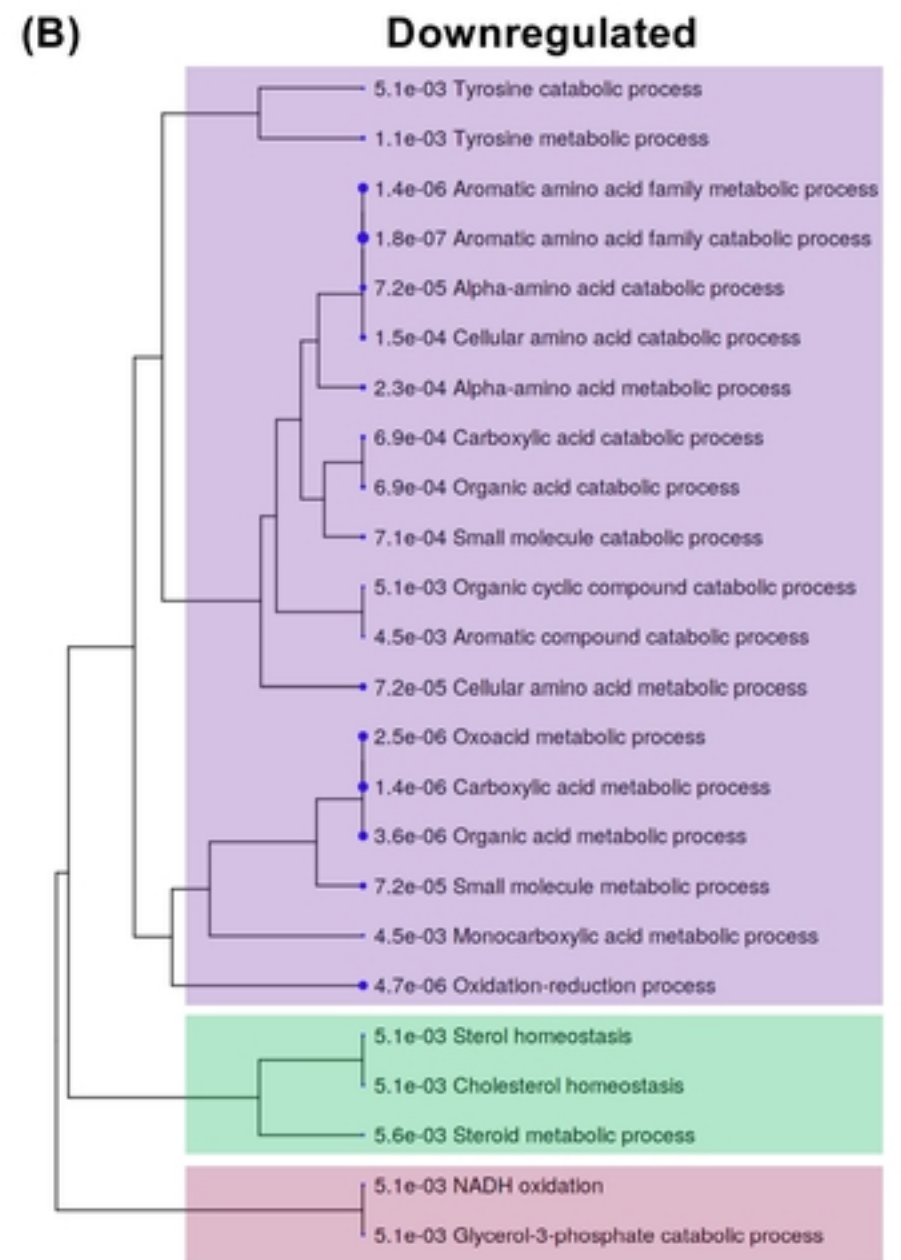

Figure3

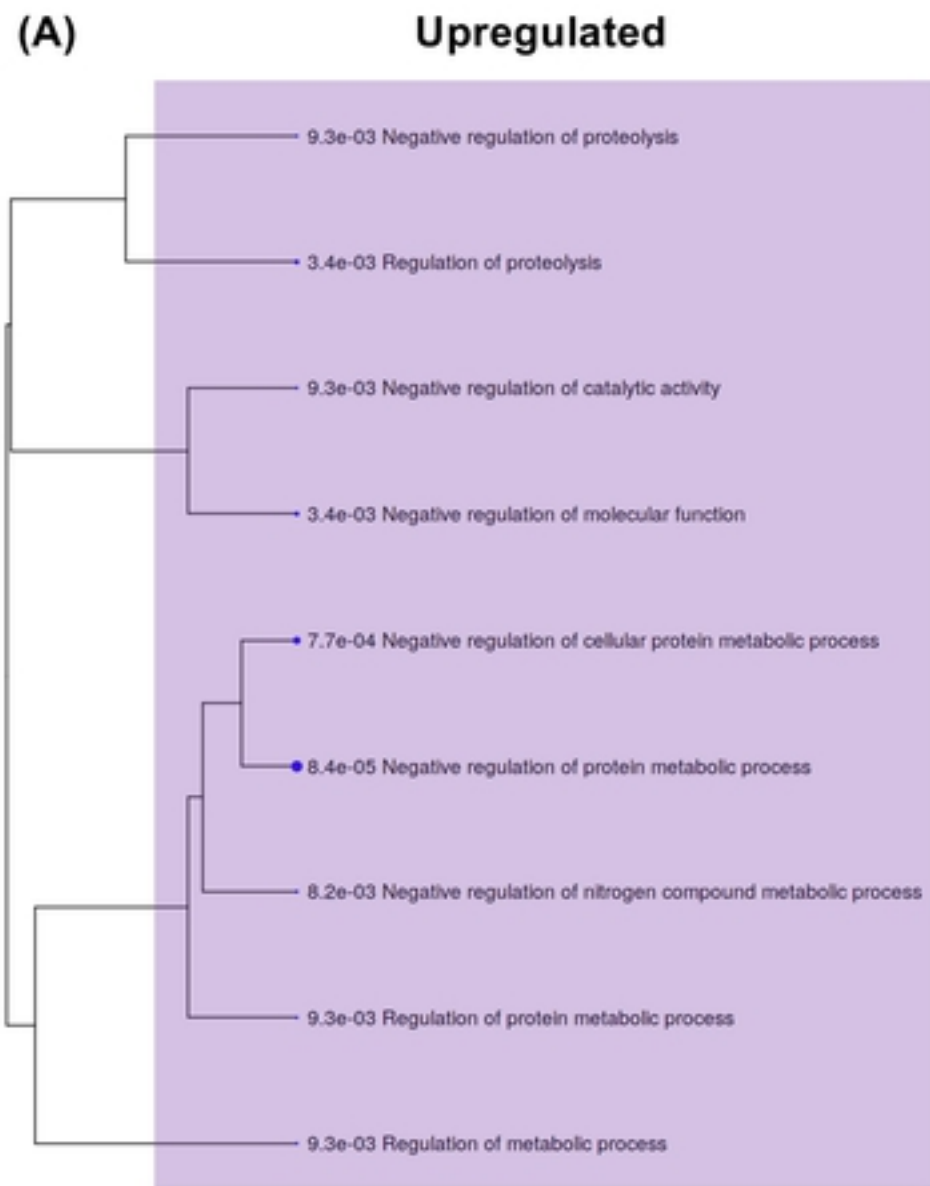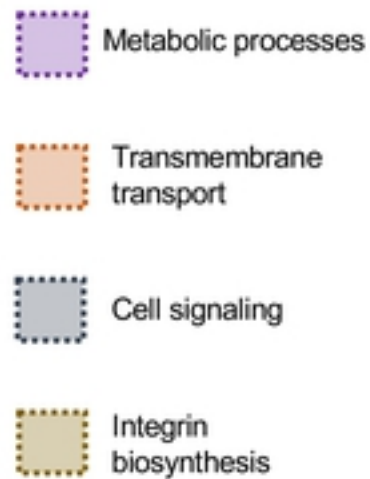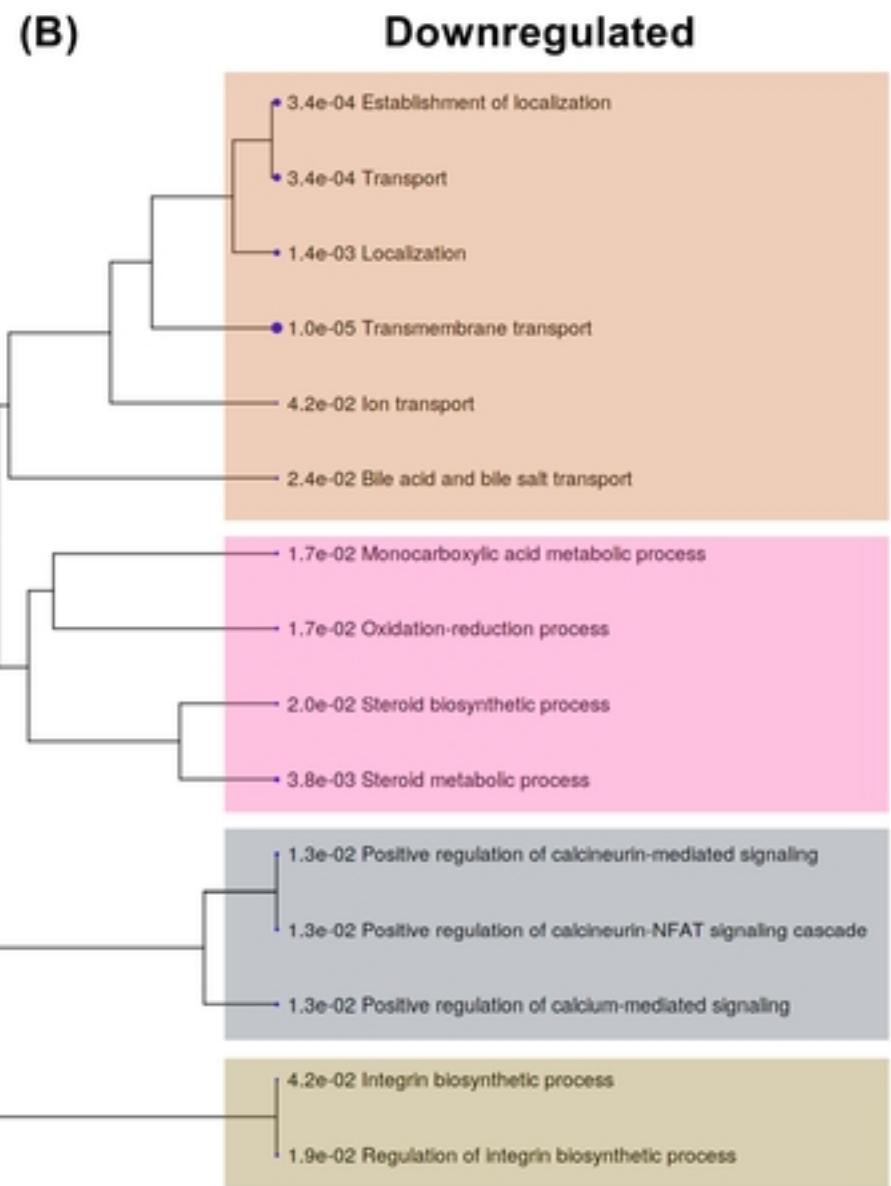

Figure4
